# Supplementary material for: Comparative analysis of various clinical specimens in detection of SARS-CoV-2 using rRT-PCR in new and follow up cases of COVID-19 infection: Quest for the best choice
Source: PubMed Central journal article supplement (PMC8021168; doi:10.1371/journal.pone.0249408), 2021-04-05
Supplement: pone.0249408.s002.pdf [file pone.0249408.s002.pdf]

# PLOS ONE

## Comparative analysis of various clinical specimens in detection of SARS-CoV-2 using rRT-PCR in new and follow up cases of COVID-19 infection: quest for the best choice --Manuscript Draft--

|                              |                                                                                                                                                                                                                                                                                                                                                                                                                                                                                                                                                                                                                                                                                                                                                                                                                                                                                                                                                                                                                                                                                                                                                                                                                                                                                                                                                                                                                                                                                                                                                                                                                                                                                                                                                                                                                                                                                                                             |
|------------------------------|-----------------------------------------------------------------------------------------------------------------------------------------------------------------------------------------------------------------------------------------------------------------------------------------------------------------------------------------------------------------------------------------------------------------------------------------------------------------------------------------------------------------------------------------------------------------------------------------------------------------------------------------------------------------------------------------------------------------------------------------------------------------------------------------------------------------------------------------------------------------------------------------------------------------------------------------------------------------------------------------------------------------------------------------------------------------------------------------------------------------------------------------------------------------------------------------------------------------------------------------------------------------------------------------------------------------------------------------------------------------------------------------------------------------------------------------------------------------------------------------------------------------------------------------------------------------------------------------------------------------------------------------------------------------------------------------------------------------------------------------------------------------------------------------------------------------------------------------------------------------------------------------------------------------------------|
| <b>Manuscript Number:</b>    | PONE-D-20-38439R1                                                                                                                                                                                                                                                                                                                                                                                                                                                                                                                                                                                                                                                                                                                                                                                                                                                                                                                                                                                                                                                                                                                                                                                                                                                                                                                                                                                                                                                                                                                                                                                                                                                                                                                                                                                                                                                                                                           |
| <b>Article Type:</b>         | Research Article                                                                                                                                                                                                                                                                                                                                                                                                                                                                                                                                                                                                                                                                                                                                                                                                                                                                                                                                                                                                                                                                                                                                                                                                                                                                                                                                                                                                                                                                                                                                                                                                                                                                                                                                                                                                                                                                                                            |
| <b>Full Title:</b>           | Comparative analysis of various clinical specimens in detection of SARS-CoV-2 using rRT-PCR in new and follow up cases of COVID-19 infection: quest for the best choice                                                                                                                                                                                                                                                                                                                                                                                                                                                                                                                                                                                                                                                                                                                                                                                                                                                                                                                                                                                                                                                                                                                                                                                                                                                                                                                                                                                                                                                                                                                                                                                                                                                                                                                                                     |
| <b>Short Title:</b>          | Evaluation of multivaried clinical specimens in diagnosis of COVID-19                                                                                                                                                                                                                                                                                                                                                                                                                                                                                                                                                                                                                                                                                                                                                                                                                                                                                                                                                                                                                                                                                                                                                                                                                                                                                                                                                                                                                                                                                                                                                                                                                                                                                                                                                                                                                                                       |
| <b>Corresponding Author:</b> | Sanjay Singh Negi, Ph.D.<br>All India Institute of Medical Sciences - Raipur<br>raipur, Chhattisgarh INDIA                                                                                                                                                                                                                                                                                                                                                                                                                                                                                                                                                                                                                                                                                                                                                                                                                                                                                                                                                                                                                                                                                                                                                                                                                                                                                                                                                                                                                                                                                                                                                                                                                                                                                                                                                                                                                  |
| <b>Keywords:</b>             | SARS-CoV-2, Coronavirus, rRT-PCR, Diagnosis                                                                                                                                                                                                                                                                                                                                                                                                                                                                                                                                                                                                                                                                                                                                                                                                                                                                                                                                                                                                                                                                                                                                                                                                                                                                                                                                                                                                                                                                                                                                                                                                                                                                                                                                                                                                                                                                                 |
| <b>Abstract:</b>             | <p>Appropriate specimen is of paramount importance in Real Time reverse transcription-polymerase chain reaction (rRT-PCR) based diagnosis of novel coronavirus (nCoV) disease (COVID-19). Thus, it's pertinent to evaluate diagnostic utility of various diversified clinical specimen in both diagnosis and follow-up of COVID-19. 924 initial specimen before initiation of treatment from 130 COVID-19 cases and 665 follow up specimen comprising equal number of NPS, OPS, combined swab, sputum, plasma, serum and urine from 15 randomly selected cases were evaluated by rRT-PCR. Demographic analysis showed males (86) twice more affected by COVID-19 than females (44) (<math>p=0.00001</math>). Male and female median age recorded was 42.97 and 32.07 years respectively. Combined swab showed positivity rate of 100 % followed by NPS (91.5%), OPS (72.3%), sputum (63%) while nCoV was found undetected in urine, plasma and serum specimens. The lowest cycle threshold (Ct) values of 10.56, 10.14 and 12.26 and average Ct values of targeted genes E (25.75; CI 24.6-26.7), ORF1b (26.94; CI 25.9-27.9) and RdRP (27.06; CI 26.1-28) indicated higher viral load in combined swab. Analysis of 665 follow-up multivaried specimens showed combined swab the last specimen to become negative, after average 6.6 (range 4-10) days post-treatment, having lowest and average Ct values of ORF1b as 15.48 and 29.96 respectively indicating posterior nasopharyngeal tract as primary nCoV afflicted site with high viral load. Combined swab should be recommended in testing guidelines of diagnosis and monitoring of COVID-19 disease by rRT-PCR and implementing same globally will definitely help in management and control of the pandemic, as it is the need of the hour. Lower Ct in combined and NPS swab indicated posterior nasopharyngeal site as the primary nCoV colonization site.</p> |
| <b>Order of Authors:</b>     | <p>Sanjay Singh Negi, Ph.D.</p> <p>Kuldeep Sharma</p> <p>Pragya Aggarwala</p> <p>Deepa Gandhi</p> <p>Anuniti Mathias</p> <p>Priyanka Singh</p> <p>Somya Sharma</p> <p>Anudita Bhargava</p> <p>Padma Das</p> <p>Ujjwala Gaikwad</p> <p>Archana Wankhede</p> <p>Ajoy Behra</p> <p>Nitin M Nagarkar</p>                                                                                                                                                                                                                                                                                                                                                                                                                                                                                                                                                                                                                                                                                                                                                                                                                                                                                                                                                                                                                                                                                                                                                                                                                                                                                                                                                                                                                                                                                                                                                                                                                        |

|                                                                                                                                                                                                                                                                                                                                                                                                                                                                                                                                                                                                                                                                                                                                                                                                                                                                                                                                                                                                                                                                                                                                                                                                                                                                                                                                                                                       |                                                                                                                                                                                                                                                                                                                                                   |
|---------------------------------------------------------------------------------------------------------------------------------------------------------------------------------------------------------------------------------------------------------------------------------------------------------------------------------------------------------------------------------------------------------------------------------------------------------------------------------------------------------------------------------------------------------------------------------------------------------------------------------------------------------------------------------------------------------------------------------------------------------------------------------------------------------------------------------------------------------------------------------------------------------------------------------------------------------------------------------------------------------------------------------------------------------------------------------------------------------------------------------------------------------------------------------------------------------------------------------------------------------------------------------------------------------------------------------------------------------------------------------------|---------------------------------------------------------------------------------------------------------------------------------------------------------------------------------------------------------------------------------------------------------------------------------------------------------------------------------------------------|
| <b>Opposed Reviewers:</b>                                                                                                                                                                                                                                                                                                                                                                                                                                                                                                                                                                                                                                                                                                                                                                                                                                                                                                                                                                                                                                                                                                                                                                                                                                                                                                                                                             | <p>Arvind Rai, MD<br/> Joint Director, National Centre for Disease Control, Delhi<br/> arvindrai62@yahoo.in<br/> Vast experience of working in Virology. Eminent Virologist in India.</p> <p>Syed Tazeen Pasha, Ph.D<br/> Joint Director, National Centre for Disease Control, Delhi<br/> negidr@yahoo.co.in<br/> Eminent Virologist in India</p> |
| <b>Response to Reviewers:</b>                                                                                                                                                                                                                                                                                                                                                                                                                                                                                                                                                                                                                                                                                                                                                                                                                                                                                                                                                                                                                                                                                                                                                                                                                                                                                                                                                         | <p>We sincerely thank PLOS editor , editorial team and reviewer for their efforts in critically reviewing our resereach article to provide various valuable suggestion. Incorporating the same will definitely help us in improving our article.</p>                                                                                              |
| <b>Additional Information:</b>                                                                                                                                                                                                                                                                                                                                                                                                                                                                                                                                                                                                                                                                                                                                                                                                                                                                                                                                                                                                                                                                                                                                                                                                                                                                                                                                                        |                                                                                                                                                                                                                                                                                                                                                   |
| <b>Question</b>                                                                                                                                                                                                                                                                                                                                                                                                                                                                                                                                                                                                                                                                                                                                                                                                                                                                                                                                                                                                                                                                                                                                                                                                                                                                                                                                                                       | <b>Response</b>                                                                                                                                                                                                                                                                                                                                   |
| <p><b>Financial Disclosure</b></p> <p>Enter a financial disclosure statement that describes the sources of funding for the work included in this submission. Review the <a href="#">submission guidelines</a> for detailed requirements. View published research articles from <a href="#">PLOS ONE</a> for specific examples.</p> <p>This statement is required for submission and <b>will appear in the published article</b> if the submission is accepted. Please make sure it is accurate.</p> <p><b>Unfunded studies</b><br/> Enter: <i>The author(s) received no specific funding for this work.</i></p> <p><b>Funded studies</b><br/> Enter a statement with the following details:</p> <ul style="list-style-type: none"> <li>• Initials of the authors who received each award</li> <li>• Grant numbers awarded to each author</li> <li>• The full name of each funder</li> <li>• URL of each funder website</li> <li>• Did the sponsors or funders play any role in the study design, data collection and analysis, decision to publish, or preparation of the manuscript?</li> <li>• <b>NO</b> - Include this sentence at the end of your statement: <i>The funders had no role in study design, data collection and analysis, decision to publish, or preparation of the manuscript.</i></li> <li>• <b>YES</b> - Specify the role(s) played.</li> </ul> <p>* typeset</p> | <p>The authors(s) received no specific funding for this work.</p>                                                                                                                                                                                                                                                                                 |
| <b>Competing Interests</b>                                                                                                                                                                                                                                                                                                                                                                                                                                                                                                                                                                                                                                                                                                                                                                                                                                                                                                                                                                                                                                                                                                                                                                                                                                                                                                                                                            | <p>The authors have declared that no competing interests exist.</p>                                                                                                                                                                                                                                                                               |

Use the instructions below to enter a competing interest statement for this submission. On behalf of all authors, disclose any [competing interests](#) that could be perceived to bias this work—acknowledging all financial support and any other relevant financial or non-financial competing interests.

This statement **will appear in the published article** if the submission is accepted. Please make sure it is accurate. View published research articles from [PLOS ONE](#) for specific examples.

#### **NO authors have competing interests**

Enter: *The authors have declared that no competing interests exist.*

#### **Authors with competing interests**

Enter competing interest details beginning with this statement:

*I have read the journal's policy and the authors of this manuscript have the following competing interests: [insert competing interests here]*

\* typeset

#### **Ethics Statement**

Enter an ethics statement for this submission. This statement is required if the study involved:

- Human participants
- Human specimens or tissue
- Vertebrate animals or cephalopods
- Vertebrate embryos or tissues
- Field research

Write "N/A" if the submission does not require an ethics statement.

General guidance is provided below.

Consult the [submission guidelines](#) for

Study is approved form Institutional Ethical committee.

Name of committe: IEC-AIIMS, Riapur.

Approval number: AIIMSRPR/IEC/2020/536

detailed instructions. **Make sure that all information entered here is included in the Methods section of the manuscript.**

#### Format for specific study types

##### Human Subject Research (involving human participants and/or tissue)

- Give the name of the institutional review board or ethics committee that approved the study
- Include the approval number and/or a statement indicating approval of this research
- Indicate the form of consent obtained (written/oral) or the reason that consent was not obtained (e.g. the data were analyzed anonymously)

##### Animal Research (involving vertebrate animals, embryos or tissues)

- Provide the name of the Institutional Animal Care and Use Committee (IACUC) or other relevant ethics board that reviewed the study protocol, and indicate whether they approved this research or granted a formal waiver of ethical approval
- Include an approval number if one was obtained
- If the study involved *non-human primates*, add *additional details* about animal welfare and steps taken to ameliorate suffering
- If anesthesia, euthanasia, or any kind of animal sacrifice is part of the study, include briefly which substances and/or methods were applied

##### Field Research

Include the following details if this study involves the collection of plant, animal, or other materials from a natural setting:

- Field permit number
- Name of the institution or relevant body that granted permission

##### Data Availability

Authors are required to make all data underlying the findings described fully available, without restriction, and from the time of publication. PLOS allows rare

No - some restrictions will apply

exceptions to address legal and ethical concerns. See the [PLOS Data Policy](#) and [FAQ](#) for detailed information.

A Data Availability Statement describing where the data can be found is required at submission. Your answers to this question constitute the Data Availability Statement and **will be published in the article**, if accepted.

**Important:** Stating 'data available on request from the author' is not sufficient. If your data are only available upon request, select 'No' for the first question and explain your exceptional situation in the text box.

Do the authors confirm that all data underlying the findings described in their manuscript are fully available without restriction?

**Describe where the data may be found in full sentences. If you are copying our sample text, replace any instances of XXX with the appropriate details.**

- If the data are **held or will be held in a public repository**, include URLs, accession numbers or DOIs. If this information will only be available after acceptance, indicate this by ticking the box below. For example: *All XXX files are available from the XXX database (accession number(s) XXX, XXX).*
- If the data are all contained **within the manuscript and/or Supporting Information files**, enter the following: *All relevant data are within the manuscript and its Supporting Information files.*
- If neither of these applies but you are able to provide **details of access elsewhere**, with or without limitations, please do so. For example:

*Data cannot be shared publicly because of [XXX]. Data are available from the XXX Institutional Data Access / Ethics Committee (contact via XXX) for researchers who meet the criteria for*

The study contains the potential information of identity of the patients and thus cannot be shared on direct request to corresponding author. Any request for the data other than shown in the paper requires an official institutional request to IEC, AIIMS, Raipur to the address mentioned below:

The Secretary Institutional Ethical Committee(IEC),  
Room No. 2103, 2nd floor,  
Medical College Complex, Gate No. 5,  
All India Institute of Medical Sciences(AIIMS), Raipur  
Chhattisgarh, India-492099.  
Phone NO.: +91 771-2577231  
Fax No. : +91 771-2572999  
Mail id: [iec@aiimsraipur.edu.in](mailto:iec@aiimsraipur.edu.in)

*access to confidential data.*

*The data underlying the results presented in the study are available from (include the name of the third party and contact information or URL).*

- This text is appropriate if the data are owned by a third party and authors do not have permission to share the data.

\* typeset

Additional data availability information:

Dated:08.02.2021

To,

Editor

PLOS One

Subject: Ethical restriction on sharing of data.

Dear Sir,

The present study entitles "***Comparative analysis of various clinical specimens in detection of SARS-CoV-2 using rRT-PCR in new and follow up cases of COVID-19 infection: quest for the best choice***" has been approved by the Institutional Ethical Committee(IEC), All India Institute of Medical Sciences(AIIMS), Raipur, Chhattisgarh. The study contains the potential information of identity of the patients and thus cannot be shared on direct request to corresponding author. Any request for the data other than shown in the manuscript requires an official institutional request to IEC, AIIMS, Raipur on the address mentioned as under.

The Secretary  
Institutional Ethical Committee(IEC),  
Room No. 2103, 2<sup>nd</sup> floor,  
Medical College Complex, Gate No. 5,  
All India Institute of Medical Sciences(AIIMS), Raipur  
Chhattisgarh, India-492099.  
Phone NO.: +91 771-2577231  
Fax No. : +91 771-2572999  
Mail id: iec@aiimsraipur.edu.in

Thus, it is requested to update our Data Availability statement on our behalf to reflect the specific information that data cannot be shared on direct request to corresponding author.

Thanking you

Sincerely yours

Dr Sanjay Singh Negi

Associate Professor

Department of Microbiology

AIIMS,Raipur

## **Comparative analysis of various clinical specimens in detection of SARS-CoV-2 using rRT-PCR in new and follow up cases of COVID-19 infection: quest for the best choice**

**Authors:** Kuldeep Sharma<sup>a,1</sup>, Pragya Aggarwala<sup>a,1</sup>, Deepa Gandhi<sup>a,1</sup>, Anuniti Mathias<sup>a,1</sup>, Priyanka Singh<sup>1</sup>, Saumya Sharma<sup>1</sup>, Sanjay Singh Negi<sup>1#</sup>, Anudita Bhargava<sup>1</sup>, Padma Das<sup>1</sup>, Ujjwala Gaikwad<sup>1</sup>, Wankhede A<sup>1</sup>, Behra A<sup>2</sup>, Nitin M Nagarkar<sup>3</sup>.

# Corresponding author

Dr. Sanjay Singh Negi  
Associate Professor  
Department of Microbiology  
AIIMS, Raipur

<sup>a</sup> Kuldeep Sharma, Pragya Aggarwala, Deepa Gandhi, Anuniti Mathias contributed equally to this work as co-first authors.

<sup>1</sup> Microbiology Department, AIIMS, Raipur, Chhattisgarh.

<sup>2</sup> COVID Nodal Officer & Associate Professor, Department of Pulmonary Medicine, AIIMS, Raipur, Chhattisgarh.

<sup>3</sup> Director, AIIMS, Raipur, Chhattisgarh.

**Running title: Evaluation of multivaried clinical specimens in diagnosis of COVID-19.**



## 2 Abstract

3 The appropriate specimen is of paramount importance in Real Time reverse transcription-  
4 polymerase chain reaction (rRT-PCR) based diagnosis of novel coronavirus (nCoV) disease  
5 (COVID-19). Thus, it is pertinent to evaluate diagnostic utility of various diversified clinical  
6 specimen in both diagnosis and follow-up of COVID-19. 924 initial specimen before  
7 initiation of treatment from 130 COVID-19 symptomatic cases and 665 follow up specimen  
8 comprising equal number of nasopharyngeal swab (NPS), oropharyngeal swab (OPS),  
9 combined ~~swab(NPS+OPS)~~, sputum, plasma, serum and urine from 15 randomly ected  
10 cases were evaluated by rRT-PCR. Demographic analysis showed males (86) twice more  
11 affected by COVID-19 than females (44) ( $p=0.00001$ ). Male and female median age recorded  
12 was 42.97 and 32.07 years, respectively. Combined swab showed positivity rate of 100 %  
13 followed by NPS (91.5%), OPS (72.3%), sputum (63%) while nCoV was found undetected in  
14 urine, plasma and serum specimens. The lowest cycle threshold (Ct) values of 10.56, 10.14  
15 and 12.26 and lowest average Ct values of targeted genes ~~*E*(25.75; CI 24.6-26.7),~~  
16 ~~*ORF1b*(26.94; CI 25.9-27.9) and *RdRP*(27.06; CI 26.1-28)~~ were found in combined swab  
17 among all specimen types to indicate higher viral load in it. Analysis of 665 follow-up multi-  
18 varied specimens also showed combined swab the last specimen among all specimen types to  
19 become negative, after average 6.6 (range 4-10) days post-treatment, having lowest and  
20 average Ct values of *ORF1b* as 15.48 and 29.96 respectively indicating posterior  
21 nasopharyngeal tract as primary nCoV afflicted site with high viral load. The combined swab  
22 thus may be more appropriate specimen for its recommendation in guidelines of both  
23 diagnosis and monitoring of COVID-19 treatment by rRT-PCR for assessing virus clearance  
24 to help physician in taking evidence based discharge decision. Implementing combined swab  
25 globally will definitely help in management and control of the pandemic, as it is the need of  
26 the hour.

27 **Key words:** SARS-CoV-2, Coronavirus, rRT-PCR, Diagnosis.

## 28 **1. Introduction**

29 SARS-CoV-2, a name given to a novel coronavirus (nCoV) by the International Committee  
30 of Taxonomy of Viruses (ICTV) was first reported in December 2019 from Wuhan, China  
31 and since then it has posed a devastating looming threat to the world, as around 216 countries  
32 and territories are so far affected by the virus causing the infection named COVID-19 [1]. Till  
33 the date of reporting on 11.11.2020, 50,810,763 were infected, and 1,263,844 succumbed  
34 worldwide to the infection [2]. India is the second most affected country after USA, with  
35 8,636,011 confirmed cases and 127,571 deaths as on 11.11.2020 [2]. The disease can occur in  
36 any age-group, being more complicated and life-threatening in patients of older age group  
37 and those with underlying co-morbid conditions such as diabetes, hypertension,  
38 cardiovascular and cerebrovascular disease [3-5]. The early clinical presentation of the  
39 COVID-19 varies from entirely asymptomatic to severely symptomatic. In India, more than  
40 70% of the laboratory confirmed cases are asymptomatic [3]. In symptomatic patients, the  
41 clinical manifestation includes fever, myalgia, dry cough, fatigue, productive cough,  
42 shortness of breath, chest pain, loss of taste and smell, etc. The radiological finding of ground  
43 -glass opacities on chest X-ray is one of the prominent observation [4,5]. Since the SARS-  
44 CoV-2 has high human-to-human transmissibility rate, the early diagnosis, immediate  
45 isolation and early treatment of positive patients is the key to successful management and  
46 preventing spread to others. Since testing is the corner stone of managing the COVID-19  
47 pandemic, highly sensitive and specific testing is essentially required, not only for early  
48 identification of both the symptomatic cases but also that of asymptomatic cases and their  
49 close high-risk contacts, to potentially breaking the transmission chain of COVID-19  
50 infection, which otherwise appears unstoppable at the moment.

51 Among various viral diagnostic modalities, virus isolation does not appear practically feasible  
52 for COVID-19 since it requires Biosafety Level (BSL)-3 laboratory, high technical expertise  
53 and longer turn around time of 3-5 days, to identify cytopathic effect in specific cell lines  
54 such as Vero E6 cells [6]. Serological test based on SARS-CoV-2 antibody detection, have  
55 been reported with varying sensitivity (34 to 80%), cross reactivity with other SARS-CoV,  
56 varying rates of seroconversion between 7 and 11 days after onset of symptoms and varying  
57 immunological response by ~~individuals~~ [7,8]. Antigen detection assays also have the  
58 limitation of poor sensitivity and negative predictive values [7].

59 Therefore, rRT-PCR is the recommended reference test to establish laboratory diagnosis of  
60 SARS-CoV-2 by detecting at least two genes from various conserved region of specific  
61 structural Spike (*S*), Envelope (*E*), Nucleocapsid (*N*) genes and the nonstructural RNA  
62 dependent RNA polymerase (*RdRp*) and replicase open reading frame (*ORF*) 1a /b, *ORF 1b*-  
63 nsp14 [5,7,9]. Various in-house and commercially available rRT-PCR test is presently being  
64 used to amplify these genes for identification of SARS-CoV-2 in the clinical specimens.  
65 Oropharyngeal and/or nasopharyngeal swabs are currently the most preferred clinical  
66 specimens due to non-invasive and easily accessible nature and utilized across the globe to  
67 diagnose COVID-19 infection. During initial period of the pandemic in Wuhan, NPS was  
68 used for the detection of SARS-CoV-2 [5]. Since then, various studies, systemic reviews and  
69 meta-analysis have evaluated the spectrum of clinical specimens in the quest of optimal  
70 specimen for its inclusion in guidelines for early identification of SARS-CoV-2 to provide  
71 timely treatment to prevent its transmission and thus better management of the pandemic [5,  
72 10-18]. These include upper respiratory tract specimen (-saliva, OPS, NPS ,  
73 lower respiratory specimen {sputum, bronchoalveolar lavage fluid (BLF) endotracheal  
74 aspirate(ET), fibrobronchoscope brush biopsy(FBB)}, blood and its products (serum,  
75 plasma), urine, feces and rectal swab. These studies and meta-analysis have various

76 conclusions, probably because of analyzing a different spectrum of clinical specimens.  
77 Systemic review and meta-analysis by Bwire et al. [17] and individual study by Wang W et  
78 al. [14] reported highest SARS-CoV-2 detection rate in BAL, while similar review and  
79 meta-analysis by Mohammadi et al. [18] and individual study by Zhang H et al. [13]  
80 recommends specimen of sputum for detection of SARS-CoV-2. Liu et al. [10] and Tong et  
81 al. [12] advocated NPS, a choice of specimen for detection of nCoV. Rao et al. [11], on the  
82 other hand, found random saliva with a higher detection rate of nCoV than paired NPS and  
83 OPS swab. The optimal clinical specimens depend on various factors of ease of accessibility,  
84 non-invasive nature, lesser risk to health care professional while collecting specimen and  
85 good viral loads for higher chances of detection. Collection of BAL, ET and FBB although  
86 have a higher detection rate and may be a specimen of choice in admitted pneumonia cases,  
87 yet it always pose a risk of generating droplets to cause infection to healthcare workers.  
88 Additionally, they also cannot be a specimen of choice in managing pandemic infection of  
89 COVID-19 showing variable clinical manifestation from asymptomatic to mild/moderate and  
90 severe cases. Sputum, on the other hand, also pose a challenge not only for collection from  
91 cases of COVID-19 patients with dry cough but also for lower detection rate of nCoV as  
92 reported earlier [12]. Overall, there is certain uncertainty on understanding the  
93 specimens/sites from which the virus can be maximally diagnosed without posing health  
94 hazard to healthcare worker. Furthermore, these published studies have also not addressed  
95 optimal specimen in patients undergoing treatment to provide the appropriate prognostic  
96 indicator of viral clearance in patients undergoing treatment. Considering these facts, this  
97 study was undertaken to evaluate the various clinical specimens that appears to be more  
98 accessible and feasible and can become a specimen of choice for early identification of  
99 SARS-CoV-2 for better management of COVID-19 pandemic. The proposed study has thus  
100 evaluated various specimens comprising of combined / paired naso and oropharyngeal swab

101 (here after referred as a combined swab in the text), NPS, OPS, sputum, plasma, serum, urine  
102 and tracheal aspirate from known positive COVID-19 patients to understand their diagnostic  
103 utility in detection of SARS-CoV-2 as well as monitoring of follow-up cases of COVID-19  
104 undergoing treatment. This study will also provide insight if this virus can also be transmitted  
105 in other ways, then merely by respiratory droplets.

## 106 **2. Methods**

### 107 **2.1. Patient selection**

108 All India Institute of Medical Sciences (AIIMS)-Raipur is one of the designated tertiary-care  
109 hospital for diagnosis and treatment of COVID-19 patients in Chhattisgarh, a state in Central  
110 India. A total of 5000 suspected patients, fulfilling either of the various testing criteria, laid  
111 down by the government of India, for COVID-19 testing, were referred to AIIMS, Raipur for  
112 diagnosis of COVID-19 by rRT-PCR test, from May 2020 till June 2020 [19].

113 Among 5000-suspected patients, 137 outpatients were diagnosed for COVID-19 infection  
114 (2.7% positivity rate) by rRT-PCR using combined swab. All these patients subsequently  
115 admitted in the COVID ward of AIIMS, Raipur for isolation and treatment. These patients  
116 were evaluated in terms of following inclusion and exclusion criteria.

#### 117 *Inclusion criteria*

118 All suspected COVID-19 symptomatic patients were included in the study if fulfilling the  
119 following criteria-

- 120 a. Detected positive for COVID-19 infection by rRT-PCR.
- 121 b. Not on any anti-viral / anti-malarial (Hydroxychloroquine) / antibiotic (Azithromycin).
- 122 c. Admitted in COVID-19 ward of AIIMS, Raipur for treatment.

#### 123 *Exclusion criteria*

124 a. Nonfulfillment of any of the inclusion criteria was considered as the exclusion criteria  
125 in the present study.

126 Among them, 07 patients with recent history of taking Azithromycin were excluded.  
127 Accordingly, only 130 patients were enrolled in the study after taking their consent. This  
128 study was approved by the Institutional ethical committee (IEC) of AIIMS, Raipur,  
129 Chhattisgarh (AIIMSRPR/IEC/2020/536).

130 Before starting a standard treatment regimen of Hydroxychloroquine and Azithromycin, all  
131 these patients were requested to provide clinical specimens of the following nature.

132 a. NPS

133 b. OPS

134 c. Combined ( naso and oropharyngeal) swab

135 d. Sputum

136 e. Serum

137 f. Plasma

138 g. Urine

139 Every swab specimen was collected in viral transport medium(VTM) (HiMedia, India) from  
140 these patients in morning before washing in the morning using sterile flocked nylon swab.

141 An NPS was collected from single nostril (posterior nasopharynx) while OPS was collected  
142 from both sides of the throat. The combined swab of both NPS and OPS was collected in a

143 single tube of VTM. In total,  $7 \times 130 = 910$  specimens were tested by rRT-PCR. In addition,

144 14 tracheal aspirates were also obtained from ~~an equal number of~~ intubated patients. Thus,  
145  $910 + 14 = 924$  specimens were obtained from new patients prior to starting their treatment.

146 The positivity rate with all the seven types of clinical specimen was also tested in randomly  
147 selected 15 patients in their daily follow-up specimen of seven types until the negative

148 finding of rRT-PCR were achieved in two consecutive days specimens of all seven types. Six  
149 hundred sixty five (665) follow-up specimens were collected from these 15 admitted patients.  
150 Thus, 924 initial and 665 follow-up specimens were tested by rRT-PCR for the identification  
151 of SARS-CoV-2.

## 152 **2.2. RNA extraction**

153 All the clinical specimens were processed for viral RNA isolation by using commercially  
154 available QIAgen Viral RNA extraction kit, Germany, as per the manufacturer instructions.  
155 Briefly, 140µl of the specimen has been treated with 560µl of prepared buffer AVL  
156 containing carrier RNA (1 µg/µl). After brief pulse vortexing and 10 minute incubation at  
157 room temperature, the specimen was precipitated by adding 560µl of pre-chilled ethanol.  
158 Treated specimen then transferred to the spin column. Viral RNA was purified by  
159 consecutive treatment with 500µl of buffer AW1 and AW2. Finally, it was eluted in 60µl  
160 buffer AVE.

## 161 **2.3. rRT-PCR test**

162 This test was performed with primers and probes provided by ICMR, targeting *E*, *RdRP* and  
163 *ORF1b* genomic region of SARS-CoV-2 and internal control of human *RNAseP* as described  
164 earlier [20-22] (Table 1). Briefly, the 25 µl rRT-PCR reaction contained 12.5 µl 2x buffer,  
165 1µl 25X RT-PCR enzyme mix (both from AgPath One-Step RT-PCR kit, ThermoFisher  
166 Scientific, USA), 1.5 µl Primer-Probe mix, 5 µl RNAse/DNase free sterile water and 5µl  
167 RNA template and tested on CFX 96 Real Time PCR machine of Biorad, USA. The thermal  
168 cycling condition included 55<sup>0</sup>C for 30 min, 95<sup>0</sup>C for 3 min and 45 repeated cycles of 95<sup>0</sup>C  
169 for 15 sec and 58<sup>0</sup>C for 30 sec. The tested specimen was considered positive for SARS-CoV-  
170 2 for the cycle threshold (Ct) value less than or equal to 35 for *E* gene and both *RdRP*, *ORF*

171 or either *RdRP* or *ORF*. The positive and negative controls consisted of of viral RNA plasmid  
 172 and sterile nuclease free water respectively.

173 **Table 1. Primer sequence of various genes of SARS-CoV-2 for rRT-PCR.**

| Target gene                      | Sequence(5'-3')                    | Source             |
|----------------------------------|------------------------------------|--------------------|
| <b>E gene</b>                    | ACAGGTACGTTAATAGTTAATAGCGT         | Corman et al. [20] |
|                                  | ATATTGCAGCAGTACGCACACA             |                    |
|                                  | FAM-ACACTAGCCATCCTTACTGCGCTTCG-BHQ |                    |
| <b>RNaseP (Internal Control)</b> | AGATTTGGACCTGCGAGCG                | CDC, 2020. [21]    |
|                                  | GAGCGGCTGTCTCCACAAGT               |                    |
|                                  | FAM-TTCTGACCTGAAGGCTCTGCGCG-BHQ    |                    |
| <b>RdRp(Confirmatory)</b>        | GTGARATGGTCATGTGTGGCGG             | Corman et al. [20] |
|                                  | CARATGTTAAASACACTATTAGCATA         |                    |
|                                  | FAM-CAGGTGGAACCTCATCAGGAGATGC-QSY  |                    |
| <b>ORF 1b(Confirmatory)</b>      | TGGGGYTTTACRGGTAACCT               | Poon et al. [22]   |
|                                  | AACRCGCTTAACAAAGCACTC              |                    |
|                                  | FAM-TAGTTGTGATGCWATCATGACTAG-QSY   |                    |

174

#### 175 **2.4. Gold standard**

176 All 130 rRT-PCR detected cases of COVID-19 infection were considered as the known  
 177 positive cases to evaluate the efficacy of various clinical specimens for diagnostic utility.

#### 178 **2.5. Statistical analysis**

179 Categorical variables were analyzed by chi-square ( $\chi^2$ ) and student t-test by using SPSS 16  
 180 version 18(SPSS Inc., Chicago, IL, USA) to compare intergroup detection rate by considering  
 181  $p < 0.05$  statistically significant.

### 182 **3. Results**

183 A total of 130 known positive cases of COVID-19 infection were evaluated in their 924  
 184 clinical specimens obtained from different anatomical sites by rRT-PCR for detection of  
 185 SARS-CoV-2 to determine their positivity rate. Demographic analysis of these patients  
 186 showed the median age of 40.14 years (range 5 to 74 years). Among them, 86 were males  
 187 while 44 were females showing significant higher COVID-19 infection rate in male than



188 female ( $\chi^2 = 27.13$ ,  $p=0.00001$ ,  $p<0.05$ ). Male median age calculated was 42.97 year,  
 189 whereas female median age observed of 32.07 years.

190 rRT-PCR detected all 130 cases with 100 % positivity in combined swab (Table 2). NPS was  
 191 the next appropriate clinical specimen showing a detection rate of 91.5% followed by OPS  
 192 and sputum specimens showing 72.3 and 63% positivity respectively. None of the specimens  
 193 of urine, plasma or serum showed detection of SARS-CoV-2. The 14 TA specimens showed  
 194 92.8% positivity by rRT-PCR. Combined swabs showed significantly higher detection rate of  
 195 SARS-CoV-2 in comparison to NPS, OPS and Sputum ( $\chi^2 =75.46$ ,  $p<0.001$ ,  $p<0.05$ ). On  
 196 comparison of various individual specimens with combined swabs, a significant difference  
 197 was noticed in positivity rate between combined swab versus NPS ( $\chi^2 =11.48$ ,  $p=0.0007$ ,  
 198  $p<0.05$ ), combined swab versus OPS ( $\chi^2 =12.68$ ,  $P<0.001$ ,  $p<0.05$ ) and combined swab  
 199 versus sputum ( $\chi^2=58.86$   $p<0.001$ ,  $p<0.05$ ). NPS positive detection rate was also found to  
 200 be significantly higher as compared to OPS and sputum specimen ( $\chi^2 =16.23$ ,  $p=0.000056$ ,  
 201  $p<0.05$ ;  $\chi^2 =30.01$ ,  $p,0.00001$ ,  $p<0.05$ ). However, OPS positive detection rate was not found  
 202 significantly higher than sputum positivity ( $\chi^2 =2.53$ ,  $p=0.11$ ,  $p>0.05$ ).

203 **Table 2. Positivity of rRT-PCR in different clinical samples in 130 known COVID-19**  
 204 **patients.**

| Total Patient<br>(n=130) | Combined<br>swab<br>(n=130)<br>No.(%)CI | NPS<br>(n=130)<br>No.(%) CI | OPS<br>(n=130)<br>No.(%) CI | Sputum<br>(n=130)<br>No.(%) CI | Urine<br>(n=130)<br>No.(%)<br>CI | Plasma<br>(n=130)<br>No.(%)<br>CI | Serum<br>(n=130)<br>No.(%)<br>CI | Tracheal<br>Aspirate<br>(n=14)<br>No.(%)<br>CI |
|--------------------------|-----------------------------------------|-----------------------------|-----------------------------|--------------------------------|----------------------------------|-----------------------------------|----------------------------------|------------------------------------------------|
| Male (n=86)              | 86(100)<br>(95.8-100)                   | 79(91.5)<br>(83.9-96.6)     | 63 (72.3)<br>(62.6-82.2)    | 54(62.7)<br>(51.7-72.9)        | 0(0)                             | 0                                 | 0                                | 13(92.8)<br>(66.1-99.8)                        |
| Female(n=44)             | 44(100)<br>(91.9-100)                   | 40(90.9)<br>(78.3-97.4)     | 31(70.4)<br>(54.8-83.2)     | 28(63.6)<br>(47.8-77.6)        | 0(0)                             | 0                                 | 0                                | NA                                             |
| <b>Total</b>             | 130(100)<br>(97.2-100)                  | 119(91.5)<br>(85.3-95.7)    | 94(72.3)<br>(63.8-79.8)     | 82(63.0)<br>(54.2-71.4)        | 0(0)                             | 0                                 | 0                                | 13(92.8)<br>(66.1-99.8)                        |

205 Tracheal aspirate was obtained from 14 male cases only. n( number tested), No. (Number),  
 206 % (Percentage), CI(Confidence Interval), NA( No samples were obtained).

207

208 Among individual swabs, NPS showed a higher detection rate than OPS. A total of 25 cases  
209 (19.2%, 16 males, 9 females) were detected in NPS but undetected in OPS (Table 2).  
210 However, a total of 11 (8.4%) cases were missed with NPS alone as the specimen, while  
211 nCoV was not detectable in 48 (36.9%) sputum specimens. No case was solely detected in  
212 OPS or sputum.

213 The Ct (threshold cycle) values of *ORF 1b*, *RdRP* and *E* gene were also compared between  
214 different clinical specimens (Fig. 1). The cluttering of the Ct values was seen due to  
215 maximum Ct values falling between 20 and 32. The lowest Ct values 10.56, 10.14 and 12.26  
216 of *E*, *ORF1b* and *RdRP* were obtained in combined swab followed by NPS, Sputum and OPS,  
217 respectively (Fig. 1). The average Ct value of *E*, *ORF* and *RdRP* were 25.75, 26.94 and 27.06  
218 in the combined swabs followed by NP, sputum and OP swabs respectively (Fig. 2). It is  
219 Theoretical correlation of inverse relationship between Ct values and viral load gives  
220 indication of higher viral load in specimen with low Ct and vice-versa. Thus, it can be  
221 inferred that maximum viral load was present in the combined swab, followed by NPS,  
222 sputum and OPS, in that order. The specimens of urine, serum and plasma did not show any  
223 sigmoidal amplification- based Ct values. The t- test comparison of average Ct value of all  
224 the targeted genes namely *E*, *ORF1b* and *RdRp* in various specimen categories showed a  
225 significant difference when the combined swab was compared individually with NPS  
226 ( $p=0.021$ ,  $t=-2.315$ ), OPS ( $p=0.0003$ ,  $t=-3.66$ ) and sputum ( $p=0.0027$ ,  $t= -3.028$ ).

227 In randomly selected 15 follow up patients' testing, all the seven different types of specimens  
228 of combined swab, NPS, OPS, sputum, serum, plasma and urine were tested every day till the  
229 two consecutive days' rRT-PCR showed negative results in every clinical specimen (Fig. 3-4,  
230 Table 3). In the 'follow-up' category, a total of 665 specimens were obtained over time  
231 ranging from 4 to 10 days, with an average of 6.66 days (Fig. 3). A gradual increase in Ct  
232 values of ORF1 b from combined swab, NPS, OPS and sputum were noticed in daily testing

233 indicating patients' affirmative response to treatment and virus clearance while other  
 234 specimens of plasma, serum and urine showed no detection of SARS-CoV-2 (Fig. 4). The  
 235 maximum longer duration of days for clearance of virus was observed in combined swab  
 236 (Fig. 4, Table 3). Earliest clearance with maximum detection of ORF1b was seen in patient  
 237 P3 in which combined swab and NPS showed the presence of virus for only two treatment  
 238 days and P11 in which only combined swab showed the presence of virus for two treatment  
 239 days. Patients 1, 2, 7, 9, 11, 12, 13, 14 and 15 exclusively showed longer duration of  
 240 detection of nCOV in a combined swab. Patient 10 shed virus in combined and NPS  
 241 specimen for longest nine days, followed by P7, which showed nCoV detection in only  
 242 combined swab for consecutive seven days. During treatment monitoring, the average days of  
 243 rRT-PCR positivity were 4.5, 3.7, 3.4 and 3.6 from combined swab, NPS, OPS and sputum,  
 244 respectively.

245 **Table 3.** ORF1b positivity of various samples for maximum number of days in daily  
 246 monitoring of 15 follow up cases.

247

| Patient No.               | ORF1b positivity for maximum number of days during treatment |     |     |            |
|---------------------------|--------------------------------------------------------------|-----|-----|------------|
|                           | Combined swab                                                | NPS | OPS | Sputum 248 |
| P1                        | 5                                                            | 4   | 4   | 4          |
| P2                        | 4                                                            | 3   | 2   | 3          |
| P3                        | 2                                                            | 2   | 1   | 1          |
| P4                        | 4                                                            | 3   | 3   | 3          |
| P5                        | 4                                                            | 4   | 4   | 4          |
| P6                        | 4                                                            | 4   | 3   | 3          |
| P7                        | 7                                                            | 5   | 5   | 5          |
| P8                        | 3                                                            | 3   | 3   | 3          |
| P9                        | 4                                                            | 2   | 2   | 2          |
| P10                       | 9                                                            | 9   | 8   | 9          |
| P11                       | 2                                                            | 1   | 1   | 1          |
| P12                       | 5                                                            | 4   | 4   | 4          |
| P13                       | 6                                                            | 5   | 5   | 5          |
| P14                       | 5                                                            | 4   | 4   | 4          |
| P15                       | 4                                                            | 3   | 3   | 3          |
| <b>Average positivity</b> | 4.5                                                          | 3.7 | 3.4 | 3.6        |

254

255

#### 256 4. Discussion

257 The discharge policy for COVID-19 cases emphasized negative rRT-PCR findings on two  
258 consecutive days respiratory specimen after symptom resolves. To give specific and accurate  
259 negative results, every laboratory needs to rule out false negative PCR result, which  
260 otherwise would lead to discharge of such patient, leading to a high probability of  
261 transmission in the community especially the family members and other close contacts. The  
262 importance of appropriate sampling in helping the lab to diagnose the COVID-19 infection  
263 accurately cannot be overemphasized. An appropriate specimen is the foundation stone for  
264 good laboratory test result and is one of the essential pre-analytical parameters for quality  
265 assurance. It is well-accepted fact that improper specimen is bound to incorrect result. It is  
266 therefore said that '*garbage in will yield garbage out*'. The appropriate specimen must also  
267 be the optimal specimen in monitoring treatment/follow-up cases to help the clinician in  
268 management by taking evidence based decision on discharge. This study was thus conducted  
269 to analyze the most appropriate specimen for performing rRT-PCR to diagnose SARS-CoV-2  
270 and monitor follow-up cases.

271 The present study showed differences in sensitivity of combined swab in comparison to NPS  
272 and OPS with which 8.2 and 19.2% positive cases were missed respectively. Thus, if tested  
273 alone, NPS and OPS may cause remarkable false negative results that could lead to discharge  
274 of these infected patients who are still shedding SARS-CoV-2 from their upper respiratory  
275 tract and may be a potential source for transmission of COVID-19 infection. We have  
276 compared various studies to assess their finding of clinical suitability of different  
277 biodiversified specimens (Table 4). In a study by Wang X et al. [23], it was observed that  
278 73.1% of positive nasopharyngeal cases could not be detected with OPS. Our study  
279 exclusively noted that 19.2% of cases were detected by only combined swabs and were  
280 missed by other specimen types. The detection rate in sputum was significantly lower as



|                     |                 |           |    |      |      |      |     |     |    |     |    |   |   |   |    |    |     |
|---------------------|-----------------|-----------|----|------|------|------|-----|-----|----|-----|----|---|---|---|----|----|-----|
| al. [33]            | e               | Positive  | -  | 155  | 65   | -    | -   | 17  | -  | -   | -  | - | - | - | -  | -  | -   |
| Liu R et al. [25]   | Cross sectional | Tested    | 5  | 57   | 4818 | -    | -   | -   | -  | -   | -  | - | - | - | -  | -  | -   |
|                     |                 | Positive  | 4  | 28   | 1843 | -    | -   | -   | -  | -   | -  | - | - | - | -  | -  | -   |
| Xie et al. [28]     | Cross sectional | Tested    | -  | -    | -    | 19   | -   | 19  | 19 | 19  | -  | - | - | - | -  | -  | -   |
|                     |                 | Positive  | -  | -    | -    | 9    | -   | 8   | 0  | 0   | -  | - | - | - | -  | -  | -   |
| Liu M et al. [10]   | Cross sectional | Tested    | -  | -    | 47   | 47   | -   | -   | -  | -   | 47 | - | - | - | -  | 47 | -   |
|                     |                 | Positive  | -  | -    | 26   | 9    | -   | -   | -  | -   | 1  | - | - | - | -  | 23 | -   |
| Rao et al. [11]     | Cross sectional | Tested    | -  | -    | -    | -    | 562 | -   | -  | -   | -  | - | - | - | -  | -  | 562 |
|                     |                 | Positive  | -  | -    | -    | -    | 48  | -   | -  | -   | -  | - | - | - | -  | -  | 60  |
| Tong et al. [12]    | Cross sectional | Tested    | 15 | 382  | 463  | 39   | -   | 262 | 40 | 135 | 98 | - | - | - | -  | -  | -   |
|                     |                 | Positive  | 7  | 61   | 297  | 10   | -   | 32  | 3  | 12  | 8  | - | - | - | -  | -  | -   |
| Zhang H et al. [13] | Cross sectional | Tested    | -  | 97   | 97   | 97   | -   | -   | -  | -   | -  | - | - | - | 14 | -  | -   |
|                     |                 | Positive# | -  | 79.2 | 37.5 | 20.8 | -   | -   | -  | -   | -  | - | - | - | 13 | -  | -   |
| Our study           | Cross sectional | Tested    | -  | 130  | 130  | 130  | 130 | -   | -  | -   | -  | - | - | - | 14 | -  | -   |
|                     |                 | Positive  | -  | 82   | 119  | 94   | 130 | -   | -  | -   | -  | - | - | - | 13 | -  | -   |

295 \*This study did not show number of specimens detected. # Figures represent percentage.

296

297 In case, if only one swab is to be used for COVID-19 diagnosis, then NPS should be  
 298 preferred over other specimens of OPS, sputum, serum, plasma and urine considering its  
 299 higher detection rate of nCoV in our study. This preference is in line with the earlier finding  
 300 of Tong et al. [12] who found higher detection rate of nCoV in NPS than BAL, OPS, Sputum,  
 301 Urine, Blood, stool, anal swabs and corneal secretions. The finding of Tong et al. [12], Lo et  
 302 al. [26], Wang X et al. [23], Wang W et al. [14] and meta-analysis by Czumbel et al. [27] also  
 303 showed NPS a better specimen for detecting SARS-CoV-2. The higher positivity rate of NPS  
 304 could be correlated to high viral load in nasopharynx than other anatomical sites/specimens.

305 Our study also found no detection of SARS-CoV-2 in clinical specimens of serum, plasma  
 306 and urine. Earlier reported study too not found nCoV in either blood or urine specimen [28].  
 307 Chan et al. [24], Lo et al. [26], Wang W et al. [14] and reported meta-analysis showed

308 negative results in urine specimen [17]. In contrast, only Tong et al. [12] had detected nCoV  
309 in urine, albeit with a low positivity rate of 16.3%. While the blood specimen was also  
310 reported of low positivity of 12.5%, 1% and 0.9% by Tong et al. [12], Bwire et al. [17] and  
311 Wang W et al. [14] respectively. Chan et al. [24] found only one positive among three tested  
312 serum specimens while there was no positivity detected in plasma specimen. The number of  
313 specimens tested by Chan et al. [24] is too low to draw any relevant conclusion. Thus, it is  
314 advocated to conduct more studies on larger cohort to evaluate the role of blood and its  
315 components in diagnosing SARS-CoV-2 by rRT-PCR and its potential role in transmitting  
316 the virus. Ours and earlier published analysis for the absence of SARS-CoV-2 in urine  
317 showed that it is not shed from the urogenital system. Among the optimal specimen, Bwire et  
318 al. [17] meta-analysis found bronchoalveolar lavage fluid with higher positive(91.8% ) rate  
319 of detection of SARS-CoV-2 followed by rectal swabs (87.8%), sputum (68.1%),  
320 nasopharyngeal swab (45.5%), feces (32.8%), oropharyngeal swab (7.6%), and blood  
321 samples (1.0%). Another meta-analysis on respiratory samples found sputum with a  
322 significantly higher positive rate of detection of nCoV followed by NPS and OPS [18]. Tong  
323 et al. [12], on the other hand, found NPS of highest positive detection rate of nCoV among  
324 specimen spectrum of BAL, NPS, OPS, sputum, urine, blood, stool, anal swab and corneal  
325 secretion (2.99%) [12]. Rao et al. [11], found saliva a better specimen than paired NPS+ OPS  
326 swab. Thus, it is inferred, that ideal appropriate specimen varied in above-discussed studies.  
327 However, considering, the fact that more studies finds NPS an ideal specimen in the  
328 identification of nCoV, our suggested combined swab may fit more into the definition of  
329 appropriate specimen in the pandemic situation due to fulfilling the parameters of  
330 applicability in variable clinical spectrum of the disease, easy accessibility in a larger group  
331 of patients, lesser risk hazard to health worker and higher detection rate than NPS.

332 The present study also showed a high positive rate of COVID-19 in males than females as  
333 infected males were almost twice that of females. The various earlier studies and meta-  
334 analysis too observed higher male susceptibility than females to COVID-19[[14](#), [23](#), [29](#)]. The  
335 prominent possible factors included higher expression of angiotensin-converting enzyme -2  
336 (ACE-2) attachment receptors in males than females, higher incidence of heart disease, high  
337 blood pressure in males, immunological differences driven by hormones and X chromosome,  
338 behavioral difference of higher level of smoking, drinking. Higher susceptibility of males was  
339 further precipitated by the reported epidemiological observation of males more casual  
340 approach than females in appropriate compliance to masking, hand hygiene and social  
341 distancing practices [[30](#), [31](#)].

342 In terms of correlating lower Ct value with high viral load, our study showed high viral load  
343 detected in the combined swab than other specimens. The individual NPS had the lowest Ct  
344 values in comparison to other individual specimens. This finding has also been corroborated  
345 by Wang W et al. [[14](#)], and Zou et al. [[32](#)], who also found higher viral load in NPS than  
346 OPS.

347 Our study also exclusively assessed the most appropriate clinical specimen to monitor the  
348 COVID-19 patients' treatment during their follow-up. Combined swabs exhibited longer  
349 duration of detection of nCoV as it is the last specimen during treatment follow-up to become  
350 negative among all seven types of specimens tested. This finding indicates that the combined  
351 swabs were the most appropriate specimen to assess virus clearance among the follow-up  
352 patients and thus equip the clinician in patient management and discharge. Data search found  
353 one brief report on 22 patients showing that sputum and feces remain positive even after NPS  
354 turn negative [[33](#)]. Another study on ten pediatric COVID 19 patients by Xu et al. [[34](#)]  
355 showed that rRT-PCR of rectal swabs was persistently positive after their NPS had become  
356 negative.



357 Novelty of the present study lies in finding combined swabs of ideal specimen in both  
358 diagnosis and monitoring of treatment follow-up of symptomatic patients to better assess  
359 virus clearance, which eventually help in discharge of truly recovered patients. This finding  
360 has clinical implication as early negative with other specimen in follow-up investigation can  
361 give pseudoimpression of virus clearance leading to the potential risk of transmission of the  
362 COVID-19 infection in case if such patients are discharged. Among the published literature,  
363 Rao et al. [11], although found lower sensitivity of paired NPS + OPS swab versus saliva in  
364 asymptomatic patient, the difference of study group leaves a scope of further study involving  
365 both symptomatic and asymptomatic patients. Nevertheless, the probable reason for higher  
366 positivity using combined swab in our study than Rao et al. [11] could be the more viral load  
367 in symptomatic than in asymptomatic patients and strict adherence to sample collection in the  
368 morning without nasal and throat wash.

369 Although stool and rectal/anal swab specimen were not tested in our study, few studies  
370 showing detection of nCoV in these specimen indicate them as a potential specimen for  
371 diagnosis [5, 10, 12, 14, 17, 23]. These findings may suggest of nCoV resist the human gut  
372 acidic medium and could be transmitted through the fecal route. Presence of nCoV in stool is  
373 also substantiated by evidential presence of its receptors ACE 2 in enterocytes. Nevertheless,  
374 the correlation of this potential biological specimen for diagnosis and probability of the virus  
375 transmission through feco-oral route deserves further evaluation, since the virus viability in  
376 stool has not yet fully explored except Wang W et al. [14] reporting live nCoV from the  
377 stool specimen.

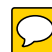

378 The present study limitation includes non-evaluation of some of the other potential specimens  
379 like BAL, FBB, saliva, stool and rectal swab. Obtaining BAL and FBB was avoided since  
380 collection requires an invasive procedure that may pose high-risk exposure of aerosol  
381 generation to health care workers. The feces and rectal/anal swab are also not primarily

382 indicated considering the respiratory droplet being the commonest established mode of  
383 transmission of nCoV. Clinical specimen of feces and rectal/anal swab cannot be considered  
384 an optimal specimen considering the limitation of difficulty in collection, transport and  
385 processing in comparison to respiratory specimens. Another specimen of saliva has a variable  
386 reported finding. Apart from Rao et al. [11] who found saliva a better specimen, earlier  
387 reported meta-analysis and review had found saliva of low sensitivity than NPS [27, 35].  
388 Considering these facts, we have not included saliva in our study in addition to another  
389 reason that it was not recommended by either WHO or our regional authorities (ICMR) in  
390 their interim guidance for detection of SARS-CoV-2 [19, 36]. We could not correlate Ct  
391 values of *ORF1b* and *RdRP* with clinical features or disease course because most of the  
392 patients' detailed clinical information was not available.

393 Thus, this study concludes that NPS and OPS alone may miss some SARS-CoV-2 positive  
394 cases and hence should not be used exclusively as the sole specimen for diagnosis. Clinical  
395 specimen of serum, plasma and urine also not to be used in detection of SARS-CoV-2 by  
396 rRT-PCR. This study strongly recommends combined swab as the preferred clinical specimen  
397 for detection of SARS-CoV-2 to establish diagnosis of COVID-19. The combined swab may  
398 also be considered the most appropriate specimen in monitoring the follow-up cases to  
399 provide a better prognostic indicator of viral clearance during treatment. Therefore, the  
400 specimen of combined swab has tremendous translational value for defining the  
401 recommendation in testing guidelines. Implementing the same globally will help manage and  
402 control the pandemic, as it is the hour's need. Lower Ct in combined and NPS specimen  
403 also indicates towards the indirect evidence of posterior nasopharynx as the primary nCoV  
404 colonization site. Since blood, serum, plasma and urine were negative for presence of nCoV  
405 in our study, the other route of transmission was not confirmed in the study and requires more  
406 studies with larger sample size for specific conclusive finding.

**407 Conflict of Interest**

408 The authors have declared that no competing interest exists.

**409 Funding Source**

410 AIIMS, Raipur, Chhattisgarh (AIIMS/Raipur/Admin/110).

**411 Authors Contributions**

412 Negi SS, Nagarkar NM, Bhargava A and Das P contributed to conception and design of the  
413 manuscript. Behra A was responsible for management of clinical specimen. Sharma K,  
414 Aggarwala P, Gandhi D, Mathias A, Sharma S, Singh P, Negi SS contributed in processing,  
415 testing and analysis of the specimens by rRT-PCR. Gaikwad U and Wankhede A searched  
416 the literature and helped in comparative analysis of our test results with earlier studies. Negi  
417 SS wrote manuscript. Negi SS and Gandhi D helped in statistical analysis. Bhargava A, Das P  
418 and Nagarkar NM critically reviewed the manuscript.

**419 References**

- 420 1. Gorbalenya AE, Baker SC, Baric RS, de Groot RJ, Drosten C, Gulyaeva AA, et al.  
421 <em>Severe acute respiratory syndrome-related coronavirus</em>; The  
422 species and its viruses – a statement of the Coronavirus Study Group. bioRxiv. 2020;  
423 2020.02.07.937862. doi:10.1101/2020.02.07.937862
- 424 2. WHO. WHO Coronavirus Disease (COVID-19) Dashboard. In:  
425 <https://covid19.who.int/> [Internet]. 2020 [cited 11 Nov 2020]. Available:  
426 <https://covid19.who.int/>
- 427 3. Bhandari S, Singh A, Sharma R, Rankawat G, Banerjee S, Gupta V, et al.  
428 Characteristics, Treatment Outcomes and Role of Hydroxychloroquine among 522

- 429 COVID-19 hospitalized patients in Jaipur City: An Epidemio-Clinical Study. *J Assoc*  
430 *Physicians India*. 2020;68: 13–19.
- 431 4. Wu Z, McGoogan JM. Characteristics of and Important Lessons From the Coronavirus  
432 Disease 2019 (COVID-19) Outbreak in China: Summary of a Report of 72 314 Cases  
433 From the Chinese Center for Disease Control and Prevention. *JAMA*. 2020;323: 1239–  
434 1242. doi:10.1001/jama.2020.2648
- 435 5. Wang D, Hu B, Hu C, Zhu F, Liu X, Zhang J, et al. Clinical Characteristics of 138  
436 Hospitalized Patients With 2019 Novel Coronavirus–Infected Pneumonia in Wuhan,  
437 China. *JAMA*. 2020;323: 1061–1069. doi:10.1001/jama.2020.1585
- 438 6. Takayama K. In Vitro and Animal Models for SARS-CoV-2 research. *Trends*  
439 *Pharmacol Sci*. 2020/05/30. 2020;41: 513–517. doi:10.1016/j.tips.2020.05.005
- 440 7. Abduljalil J. Laboratory diagnosis of SARS-CoV-2: available approaches and  
441 limitations. *New Microbes New Infect*. 2020;36: 100713.  
442 doi:10.1016/j.nmni.2020.100713
- 443 8. Kontou PI, Braliou GG, Dimou NL, Nikolopoulos G, Bagos PG. Antibody Tests in  
444 Detecting SARS-CoV-2 Infection: A Meta-Analysis. *Diagnostics (Basel, Switzerland)*.  
445 2020;10: 319. doi:10.3390/diagnostics10050319
- 446 9. Gao Z. Efficient management of novel coronavirus pneumonia by efficient prevention  
447 and control in scientific manner. *Zhonghua Jie He He Hu Xi Za Zhi*. 2020;43: E001.  
448 doi:10.3760/cma.j.issn.1001-0939.2020.0001
- 449 10. Liu M, Li Q, Zhou J, Ai W, Zheng X, Zeng J, et al. Value of swab types and collection  
450 time on SARS-COV-2 detection using RT-PCR assay. *J Virol Methods*. 2020/09/16.  
451 2020;286: 113974. doi:10.1016/j.jviromet.2020.113974

- 452 11. Rao M, Rashid FA, Sabri FSAH, Jamil NN, Seradja V, Abdullah NA, et al. COVID-19  
453 screening test by using random oropharyngeal saliva. *J Med Virol.* 2021;n/a.  
454 doi:<https://doi.org/10.1002/jmv.26773>
- 455 12. Tong Y, Bao A, Chen H, Huang J, Lv Z, Feng L, et al. Necessity for detection of  
456 SARS-CoV-2 RNA in multiple types of specimens for the discharge of the patients  
457 with COVID-19. *J Transl Med.* 2020;18: 411. doi:10.1186/s12967-020-02580-w
- 458 13. Zhang H, Chen M, Zhang Y, Wen J, Wang Y, Wang L, et al. The Yield and  
459 Consistency of the Detection of SARS-CoV-2 in Multiple Respiratory Specimens.  
460 *Open Forum Infect Dis.* 2020;7. doi:10.1093/ofid/ofaa379
- 461 14. Wang W, Xu Y, Gao R, Lu R, Han K, Wu G, et al. Detection of SARS-CoV-2 in  
462 Different Types of Clinical Specimens. *JAMA.* 2020;323: 1843–1844.  
463 doi:10.1001/jama.2020.3786
- 464 15. Zhang W, Du R-H, Li B, Zheng X-S, Yang X-L, Hu B, et al. Molecular and  
465 serological investigation of 2019-nCoV infected patients: implication of multiple  
466 shedding routes. *Emerg Microbes Infect.* 2020;9: 386–389.  
467 doi:10.1080/22221751.2020.1729071
- 468 16. Pan Y, Zhang D, Yang P, Poon LLM, Wang Q. Viral load of SARS-CoV-2 in clinical  
469 samples. *Lancet Infect Dis.* 2020/02/24. 2020;20: 411–412. doi:10.1016/S1473-  
470 3099(20)30113-4
- 471 17. Bwire GM, Majigo M V, Njiro BJ, Mawazo A. Detection profile of SARS-CoV-2  
472 using RT-PCR in different types of clinical specimens: A systematic review and meta-  
473 analysis. *J Med Virol.* 2021;93: 719–725. doi:<https://doi.org/10.1002/jmv.26349>
- 474 18. Mohammadi A, Esmaeilzadeh E, Li Y, Bosch RJ, Li JZ. SARS-CoV-2 detection in

- 475 different respiratory sites: A systematic review and meta-analysis. *EBioMedicine*.  
476 2020;59: 102903. doi:<https://doi.org/10.1016/j.ebiom.2020.102903>
- 477 19. ICMR. Indian Council of Medical Research (ICMR).Strategy for COVID-19 testing in  
478 India. Version 5. In: [https:// www.icmr.gov.in / pdf / covid / strategy /](https://www.icmr.gov.in/pdf/covid/strategy/Testing_Strategy_v5_18052020.pdf)  
479 [Testing\\_Strategy\\_v5\\_ 18052020.pdf](https://www.icmr.gov.in/pdf/covid/strategy/Testing_Strategy_v5_18052020.pdf). [Internet]. 2020 [cited 18 May 2020]. Available:  
480 [https:// www.icmr.gov.in / pdf / covid / strategy / Testing\\_Strategy\\_v5\\_](https://www.icmr.gov.in/pdf/covid/strategy/Testing_Strategy_v5_18052020.pdf)  
481 [18052020.pdf](https://www.icmr.gov.in/pdf/covid/strategy/Testing_Strategy_v5_18052020.pdf).
- 482 20. Corman VM, Landt O, Kaiser M, Molenkamp R, Meijer A, Chu DK, et al. Detection  
483 of 2019 novel coronavirus (2019-nCoV) by real-time RT-PCR. *Euro Surveill*. 2020;25:  
484 2000045. doi:10.2807/1560-7917.ES.2020.25.3.2000045
- 485 21. WHO. CDC protocol of realtime RTPCR for influenza A (H1N1). In: [https:// www .  
486 who. Int / csr / resources / publications / swineflu / real time rtpcr/en/](https://www.who.int/csr/resources/publications/swineflu/real_time_rtpcr/en/). [Internet]. 2020  
487 [cited 22 Sep 2020]. Available: [https:// www . who. Int / csr / resources / publications  
488 / swineflu / real time rtpcr/en/](https://www.who.int/csr/resources/publications/swineflu/real_time_rtpcr/en/).
- 489 22. Poon L, Chu D, Peiris M. Detection of 2019 novel coronavirus(2019-nCoV) in  
490 suspected human cases by RT-PCR. School of Public Health, The University of Hong  
491 Kong, Hong Kong. In: [https://www.who.int/docs/default-source/coronaviruse/peiris-  
492 protocol-16-1-20](https://www.who.int/docs/default-source/coronaviruse/peiris-protocol-16-1-20). [Internet]. 2020 [cited 22 Sep 2020]. Available:  
493 <https://www.who.int/docs/default-source/coronaviruse/peiris-protocol-16-1-20>.
- 494 23. Wang X, Tan L, Wang X, Liu W, Lu Y, Cheng L, et al. Comparison of  
495 nasopharyngeal and oropharyngeal swabs for SARS-CoV-2 detection in 353 patients  
496 received tests with both specimens simultaneously. *Int J Infect Dis*. 2020/04/18.  
497 2020;94: 107–109. doi:10.1016/j.ijid.2020.04.023

- 498 24. Chan JF-W, Yuan S, Kok K-H, To KK-W, Chu H, Yang J, et al. A familial cluster of  
499 pneumonia associated with the 2019 novel coronavirus indicating person-to-person  
500 transmission: a study of a family cluster. *Lancet*. 2020;395: 514–523.  
501 doi:10.1016/S0140-6736(20)30154-9
- 502 25. Liu R, Han H, Liu F, Lv Z, Wu K, Liu Y, et al. Positive rate of RT-PCR detection of  
503 SARS-CoV-2 infection in 4880 cases from one hospital in Wuhan, China, from Jan to  
504 Feb 2020. *Clin Chim Acta*. 2020/03/07. 2020;505: 172–175.  
505 doi:10.1016/j.cca.2020.03.009
- 506 26. Lo IL, Lio CF, Cheong HH, Lei CI, Cheong TH, Zhong X, et al. Evaluation of SARS-  
507 CoV-2 RNA shedding in clinical specimens and clinical characteristics of 10 patients  
508 with COVID-19 in Macau. *Int J Biol Sci*. 2020;16: 1698–1707. doi:10.7150/ijbs.45357
- 509 27. Czumbel LM, Kiss S, Farkas N, Mandel I, Hegyi A, Nagy Á, et al. Saliva as a  
510 Candidate for COVID-19 Diagnostic Testing: A Meta-Analysis. *Front Med*. 2020;7:  
511 465. doi:10.3389/fmed.2020.00465
- 512 28. Xie C, Jiang L, Huang G, Pu H, Gong B, Lin H, et al. Comparison of different samples  
513 for 2019 novel coronavirus detection by nucleic acid amplification tests. *Int J Infect*  
514 *Dis*. 2020;93: 264–267. doi:https://doi.org/10.1016/j.ijid.2020.02.050
- 515 29. Wei X, Xiao Y-T, Wang J, Chen R, Zhang W, Yang Y, et al. Sex Differences in  
516 Severity and Mortality Among Patients With COVID-19: Evidence from Pooled  
517 Literature Analysis and Insights from Integrated Bioinformatic Analysis. 2020.
- 518 30. Bwire GM. Coronavirus: Why Men are More Vulnerable to Covid-19 Than Women?  
519 *SN Compr Clin Med*. 2020; 1–3. doi:10.1007/s42399-020-00341-w
- 520 31. Sharma G, Volgman AS, Michos ED. Sex Differences in Mortality From COVID-19

- 521 Pandemic: Are Men Vulnerable and Women Protected? *JACC Case reports*.  
522 2020/05/04. 2020;2: 1407–1410. doi:10.1016/j.jaccas.2020.04.027
- 523 32. Zou L, Ruan F, Huang M, Liang L, Huang H, Hong Z, et al. SARS-CoV-2 Viral Load  
524 in Upper Respiratory Specimens of Infected Patients. *N Engl J Med*. 2020;382: 1177–  
525 1179. doi:10.1056/NEJMc2001737
- 526 33. Chen C, Gao G, Xu Y, Pu L, Wang Q, Wang L, et al. SARS-CoV-2-Positive Sputum  
527 and Feces After Conversion of Pharyngeal Samples in Patients With COVID-19. *Ann*  
528 *Intern Med*. 2020/03/30. 2020;172: 832–834. doi:10.7326/M20-0991
- 529 34. Xu Y, Li X, Zhu B, Liang H, Fang C, Gong Y, et al. Characteristics of pediatric  
530 SARS-CoV-2 infection and potential evidence for persistent fecal viral shedding. *Nat*  
531 *Med*. 2020/03/13. 2020;26: 502–505. doi:10.1038/s41591-020-0817-4
- 532 35. Martinez RM. Clinical Samples for SARS-CoV-2 Detection: Review of the Early  
533 Literature. *Clin Microbiol Newsl*. 2020;42: 121–127.  
534 doi:<https://doi.org/10.1016/j.clinmicnews.2020.07.001>
- 535 36. WHO. Interim Guidance Diagnostic testing for SARS-CoV-2. In:  
536 [https://apps.who.int/iris/bitstream/handle/10665/334254/WHO-2019-nCoV-laboratory-](https://apps.who.int/iris/bitstream/handle/10665/334254/WHO-2019-nCoV-laboratory-2020.6-eng)  
537 [2020.6-eng](https://apps.who.int/iris/bitstream/handle/10665/334254/WHO-2019-nCoV-laboratory-2020.6-eng) [Internet]. 2020 [cited 3 Feb 2020]. Available:  
538 [https://apps.who.int/iris/bitstream/handle/10665/334254/WHO-2019-nCoV-laboratory-](https://apps.who.int/iris/bitstream/handle/10665/334254/WHO-2019-nCoV-laboratory-2020.6-eng)  
539 [2020.6-eng](https://apps.who.int/iris/bitstream/handle/10665/334254/WHO-2019-nCoV-laboratory-2020.6-eng)

540



## Figure legends

**Fig 1.** The threshold cycle(Ct) values of *E*, *RdRP* and *ORF 1ab* region of SARS-CoV-2 in different clinical samples obtained from 130 patients. The lowest Ct values of all the three target of *E*, *RdRP* and *ORF 1ab* were obtained in combined Throat and nasopharyngeal swabs followed by NP, Sputum and Throat swabs. Urine, Plasma and Serum samples have not shown any amplification.

**Fig 2.** The average Ct value of *E*, *RdRP* and *ORF 1ab* gene in different clinical samples.

**Fig 3.** Number of samples tested for 15 follow up cases till rRT-PCR showed negative results in two consecutive days sample. Total number of samples per patients divided by 7 number of samples collected on daily basis gives the number of days the samples were collected for particular patients. Last two days 7 different types of samples were found negative for all the patients.

**Fig 4.** The values of Ct of *ORF 1ab* in various clinical samples of 15 follow up cases.

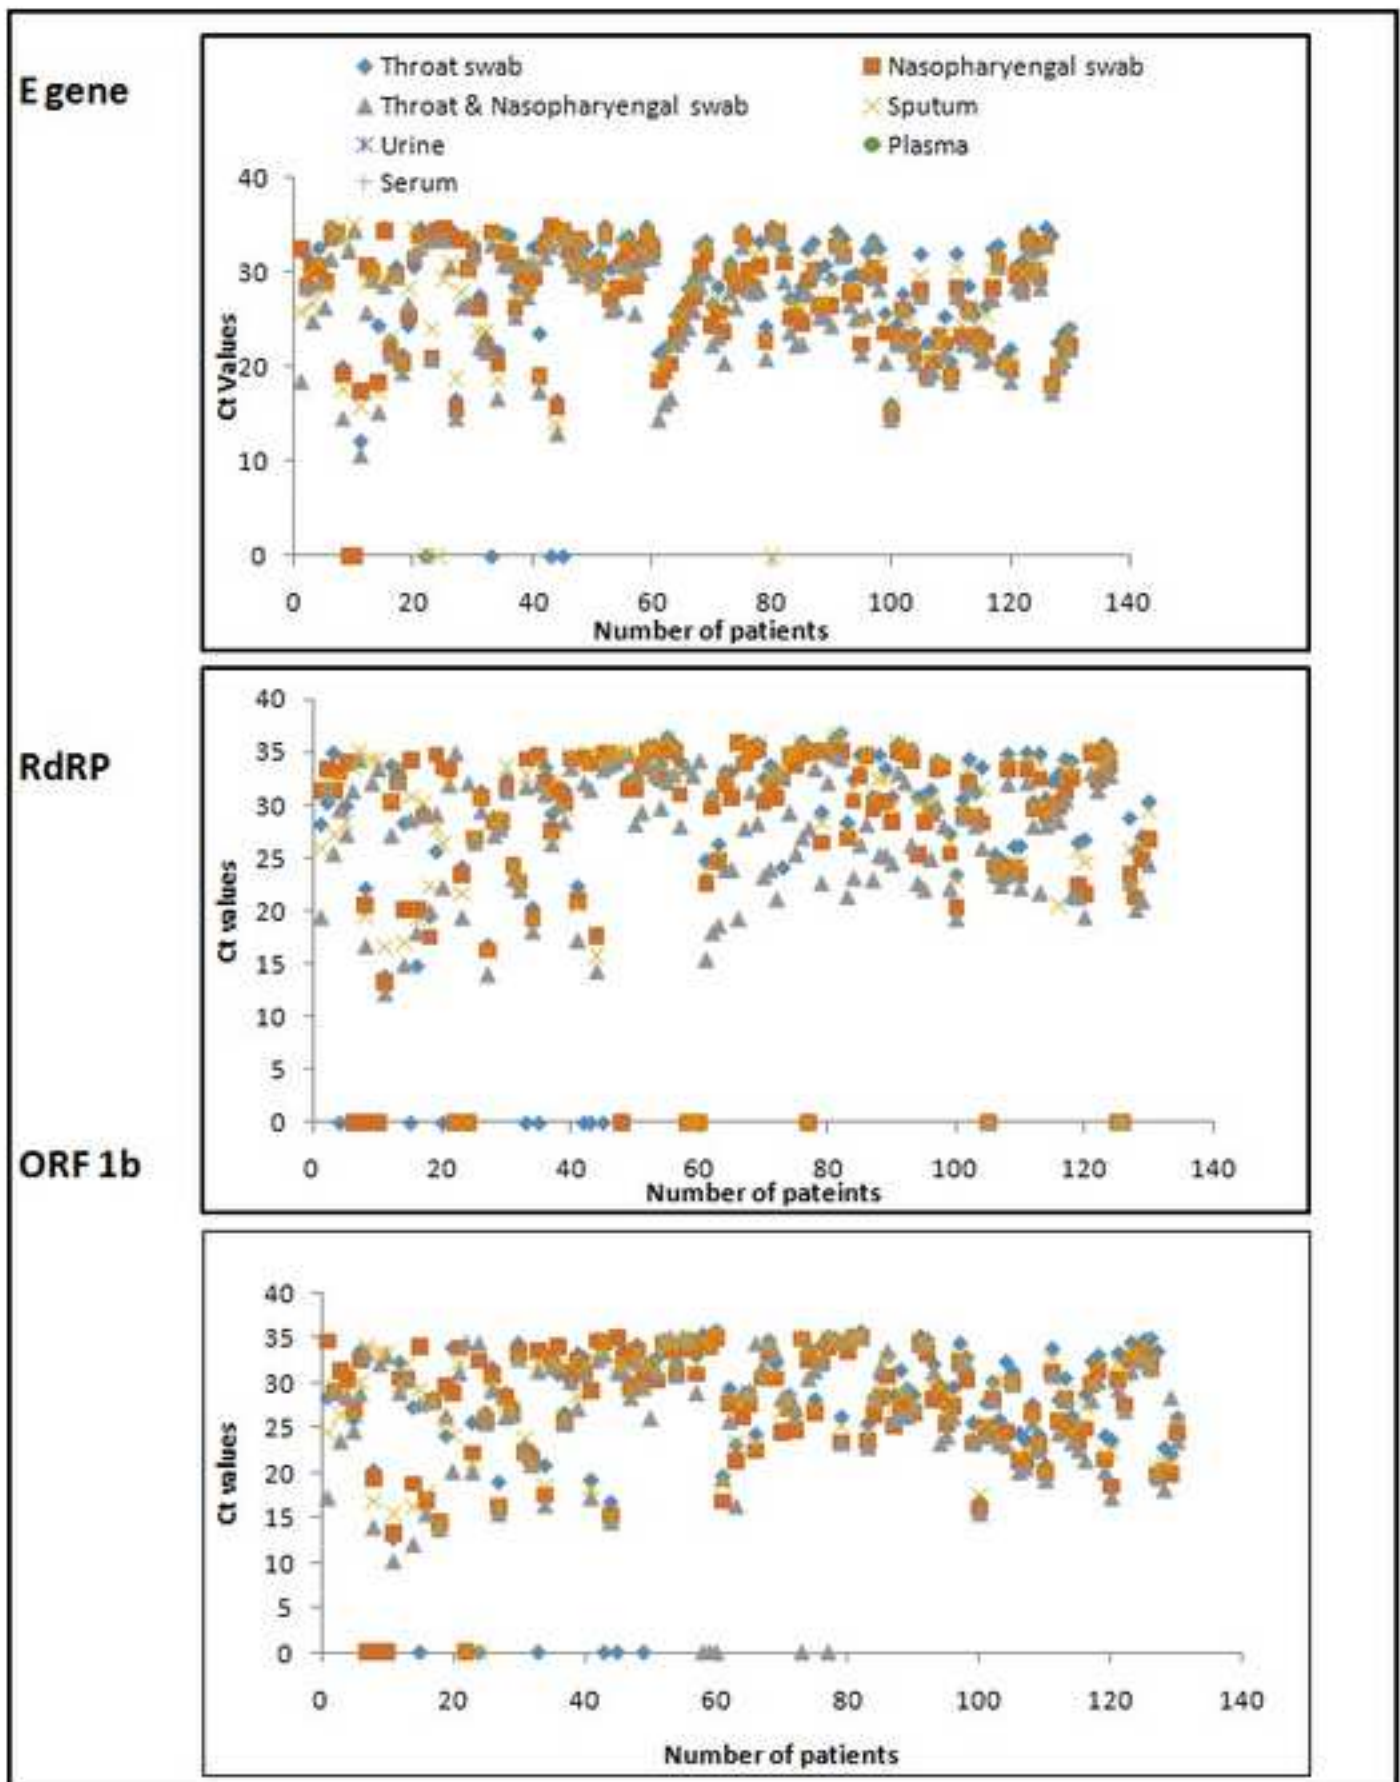

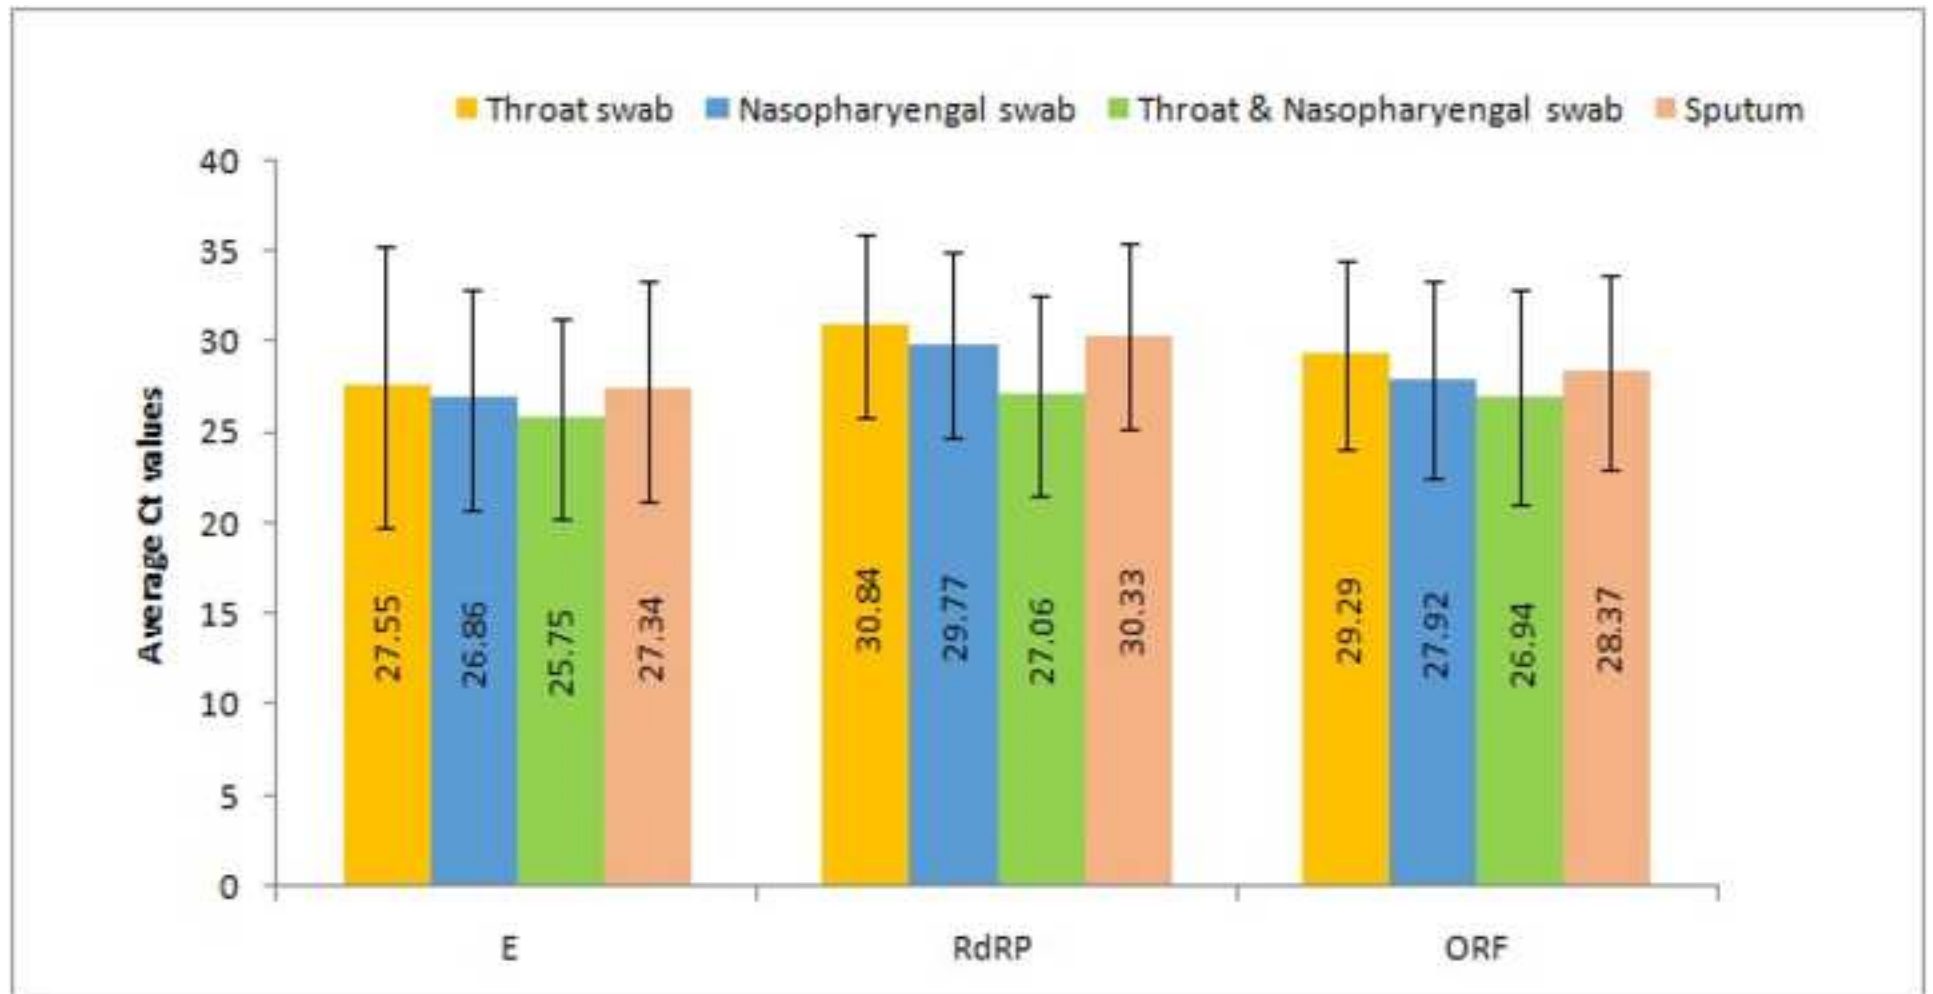

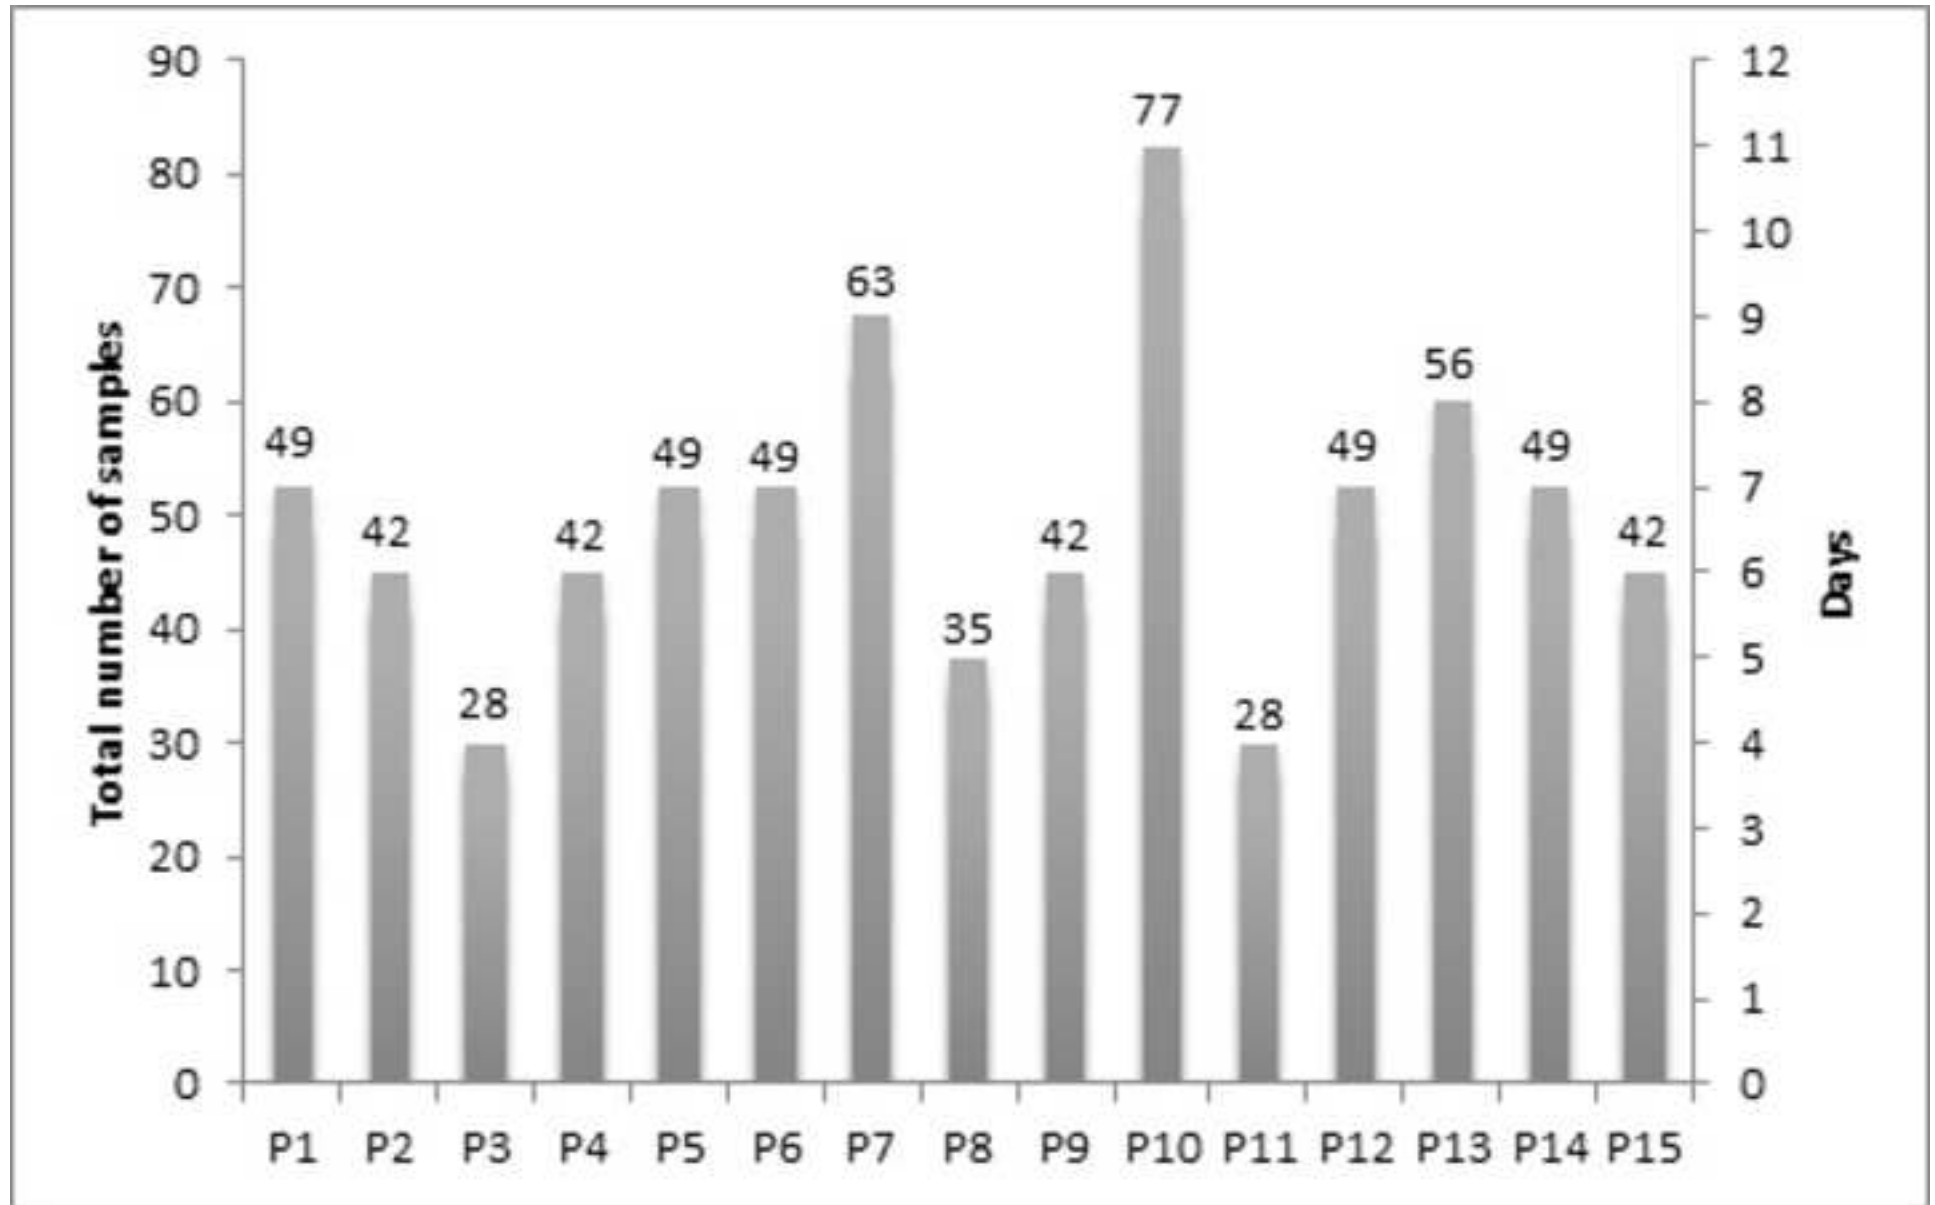

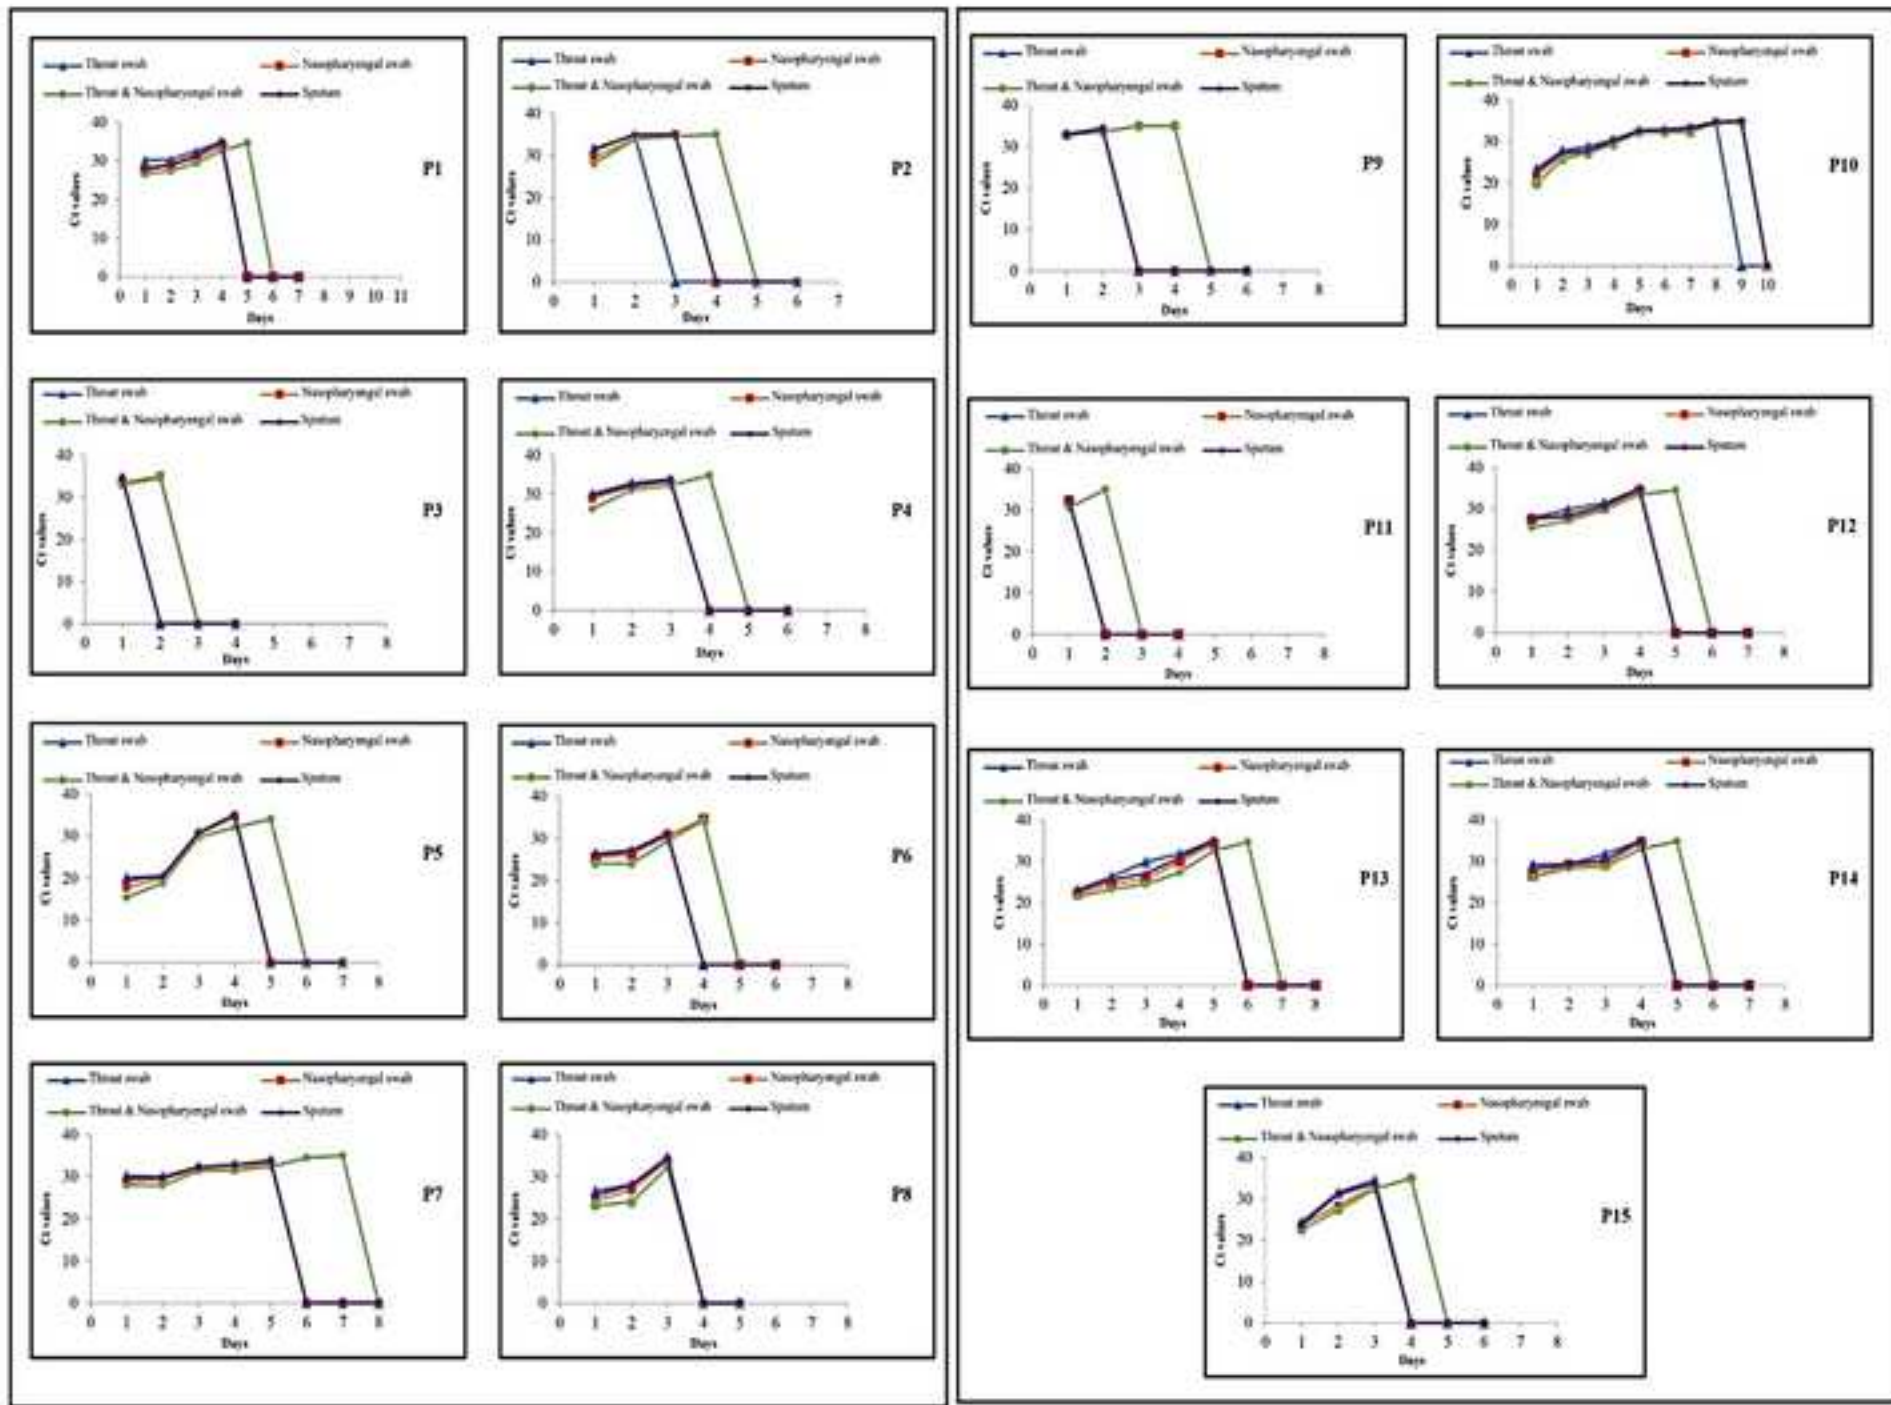

**Comparative analysis of various clinical specimens in detection of SARS-CoV-2 using rRT-PCR in new and follow up cases of COVID-19 infection: quest for the best choice**

**Authors:** Kuldeep Sharma<sup>a,1</sup>, Pragya Aggarwala<sup>a,1</sup>, Deepa Gandhi<sup>a,1</sup>, Anuniti Mathias<sup>a,1</sup>, Priyanka Singh<sup>1</sup>, Saumya Sharma<sup>1</sup>, Sanjay Singh Negi<sup>1#</sup>, Anudita Bhargava<sup>1</sup>, Padma Das<sup>1</sup>, Ujjwala Gaikwad<sup>1</sup>, Wankhede A<sup>1</sup>, Behra A<sup>2</sup>, Nitin M Nagarkar<sup>3</sup>.

# Corresponding author

Dr. Sanjay Singh Negi  
Associate Professor  
Department of Microbiology  
AIIMS, Raipur

<sup>a</sup> Kuldeep Sharma, Pragya Aggarwala, Deepa Gandhi, Anuniti Mathias contributed equally to this work as co-first authors.

<sup>1</sup> Microbiology Department, AIIMS, Raipur, Chhattisgarh.

<sup>2</sup> COVID Nodal Officer & Associate Professor, Department of Pulmonary Medicine, AIIMS, Raipur, Chhattisgarh.

<sup>3</sup> Director, AIIMS, Raipur, Chhattisgarh.

**Running title: Evaluation of multivaried clinical specimens in diagnosis of COVID-19.**

## 2 Abstract

3 The appropriate specimen is of paramount importance in Real Time reverse transcription-  
 4 polymerase chain reaction (rRT-PCR) based diagnosis of novel coronavirus (nCoV) disease  
 5 (COVID-19). Thus, it is pertinent to evaluate diagnostic utility of various diversified clinical  
 6 specimen in both diagnosis and follow-up of COVID-19. 924 initial specimen before  
 7 initiation of treatment from 130 COVID-19 symptomatic cases and 665 follow up specimen  
 8 comprising equal number of nasopharyngeal swab (NPS), oropharyngeal swab (OPS),  
 9 combined swab(NPS+OPS), sputum, plasma, serum and urine from 15 randomly selected  
 10 cases were evaluated by rRT-PCR. Demographic analysis showed males (86) twice more  
 11 affected by COVID-19 than females (44) ( $p=0.00001$ ). Male and female median age recorded  
 12 was 42.97 and 32.07 years, respectively. Combined swab showed positivity rate of 100 %  
 13 followed by NPS (91.5%), OPS (72.3%), sputum (63%) while nCoV was found undetected in  
 14 urine, plasma and serum specimens. The lowest cycle threshold (Ct) values of 10.56, 10.14  
 15 and 12.26 and lowest average Ct values of targeted genes *E*(25.75; CI 24.6-26.7),  
 16 *ORF1b*(26.94; CI 25.9-27.9) and *RdRP*(27.06; CI 26.1-28) were found in combined swab  
 17 among all specimen types to indicate higher viral load in it. Analysis of 665 follow-up multi-  
 18 varied specimens also showed combined swab the last specimen among all specimen types to  
 19 become negative, after average 6.6 (range 4-10) days post-treatment, having lowest and  
 20 average Ct values of *ORF1b* as 15.48 and 29.96 respectively indicating posterior  
 21 nasopharyngeal tract as primary nCoV afflicted site with high viral load. The combined swab  
 22 thus may be more appropriate specimen for its recommendation in guidelines of both  
 23 diagnosis and monitoring of COVID-19 treatment by rRT-PCR for assessing virus clearance  
 24 to help physician in taking evidence based discharge decision. Implementing combined swab  
 25 globally will definitely help in management and control of the pandemic, as it is the need of  
 26 the hour.

**Commented [DSN1]:** Specific Comment 2:  
 Abstract, line 8: Please spell out Please spell out NPS (nasopharyngeal swabs) and OPS (oropharyngeal swabs) here since this is the first time NPS and OPS were mentioned. What is combined swab? Do the authors mean combined nose throat swab? Please clarify.

Reply: As per the kind suggestion of the reviewer, necessary changes have been done in line 8 of the revised abstract. We further kindly submit that the combined swab consist of both nasopharyngeal and oropharyngeal swab in a single tube of viral transport medium. The same has been incorporated in the Method section of the revised manuscript.

27 **Key words:** SARS-CoV-2, Coronavirus, rRT-PCR, Diagnosis.

## 28 1. Introduction

29 SARS-CoV-2, a name given to a novel coronavirus (nCoV) by the International Committee  
30 of Taxonomy of Viruses (ICTV) was first reported in December 2019 from Wuhan, China  
31 and since then it has posed a devastating looming threat to the world, as around 216 countries  
32 and territories are so far affected by the virus causing the infection named COVID-19 [1]. Till  
33 the date of reporting on 11.11.2020, 50,810,763 were infected, and 1,263,844 succumbed  
34 worldwide to the infection [2]. India is the second most affected country after USA, with  
35 8,636,011 confirmed cases and 127,571 deaths as on 11.11.2020 [2]. The disease can occur in  
36 any age-group, being more complicated and life-threatening in patients of older age group  
37 and those with underlying co-morbid conditions such as diabetes, hypertension,  
38 cardiovascular and cerebrovascular disease [3-5]. The early clinical presentation of the  
39 COVID-19 varies from entirely asymptomatic to severely symptomatic. In India, more than  
40 70% of the laboratory confirmed cases are asymptomatic [3]. In symptomatic patients, the  
41 clinical manifestation includes fever, myalgia, dry cough, fatigue, productive cough,  
42 shortness of breath, chest pain, loss of taste and smell, etc. The radiological finding of ground  
43 -glass opacities on chest X-ray is one of the prominent observation [4,5]. Since the SARS-  
44 CoV-2 has high human-to-human transmissibility rate, the early diagnosis, immediate  
45 isolation and early treatment of positive patients is the key to successful management and  
46 preventing spread to others. Since testing is the corner stone of managing the COVID-19  
47 pandemic, highly sensitive and specific testing is essentially required, not only for early  
48 identification of both the symptomatic cases but also that of asymptomatic cases and their  
49 close high-risk contacts, to potentially breaking the transmission chain of COVID-19  
50 infection, which otherwise appears unstoppable at the moment.

**Commented [DSN2]:** Specific Comment 3: Line 33: "...in extreme of age.", Did the authors mean younger and older or just older? This needs rephrasing and clarify.

**Our Reply:** The authors meant to say that people of all ages are susceptible to COVID-19 infection. However, various studies have concluded beyond any doubt that older age group and persons with underlying conditions are more susceptible to COVID-19 infection and had a higher case fatality rate. As per the reviewer suggestion, we have reframed this line and it will now be read as "The disease can occur in any age group being more complicated and life threatening in patients of older age group and those with underlying co- morbid conditions such as diabetes, hypertension, cardiovascular and cerebrovascular diseases (Bhandari S et al, 2020; Wu and McGoogan JM 2020; Wang D et al, 2020)."



51 Among various viral diagnostic modalities, virus isolation does not appear practically feasible  
52 for COVID-19 since it requires Biosafety Level (BSL)-3 laboratory, high technical expertise  
53 and longer turn around time of 3-5 days, to identify cytopathic effect in specific cell lines  
54 such as Vero E6 cells [6]. Serological test based on SARS-CoV-2 antibody detection, have  
55 been reported with varying sensitivity (34 to 80%), cross reactivity with other SARS-CoV,  
56 varying rates of seroconversion between 7 and 11 days after onset of symptoms and varying  
57 immunological response by individual s[7,8]. Antigen detection assays also have the  
58 limitation of poor sensitivity and negative predictive values [7].

59 Therefore, rRT-PCR is the recommended reference test to establish laboratory diagnosis of  
60 SARS-CoV-2 by detecting at least two genes from various conserved region of specific  
61 structural Spike (*S*), Envelope (*E*), Nucleocapsid (*N*) genes and the nonstructural RNA  
62 dependent RNA polymerase (*RdRp*) and replicase open reading frame (*ORF*) 1a /b, *ORF 1b*-  
63 nsp14 [5,7,9]. Various in-house and commercially available rRT-PCR test is presently being  
64 used to amplify these genes for identification of SARS-CoV-2 in the clinical specimens.  
65 Oropharyngeal and or nasopharyngeal swabs are currently the most preferred clinical  
66 specimens due to non-invasive and easily accessible nature and utilized across the globe to  
67 diagnose COVID-19 infection. During initial period of the pandemic in Wuhan, NPS was  
68 used for the detection of SARS-CoV-2 [5]. Since then, various studies, systemic reviews and  
69 meta-analysis have evaluated the spectrum of clinical specimens in the quest of optimal  
70 specimen for its inclusion in guidelines for early identification of SARS-CoV-2 to provide  
71 timely treatment to prevent its transmission and thus better management of the pandemic [5,  
72 10-18]. These include upper respiratory tract specimen ( saliva, OPS, NPS, nasal swab),  
73 lower respiratory specimen {sputum, bronchoalveolar lavage fluid (BLF) endotracheal  
74 aspirate(ET), fibrobronchoscope brush biopsy(FBB)}, blood and its products (serum,  
75 plasma), urine, feces and rectal swab. These studies and meta-analysis have various

76 conclusions, probably because of analyzing a different spectrum of clinical specimens.  
77 Systemic review and meta-analysis by Bwire et al. [17] and individual study by Wang W et  
78 al. [14] reported highest SARS-CoV-2 detection rate in BAL, while similar review and  
79 meta-analysis by Mohammadi et al. [18] and individual study by Zhang H et al. [13]  
80 recommends specimen of sputum for detection of SARS-CoV-2. Liu et al. [10] and Tong et  
81 al. [12] advocated NPS, a choice of specimen for detection of nCoV. Rao et al. [11], on the  
82 other hand, found random saliva with a higher detection rate of nCoV than paired NPS and  
83 OPS swab. The optimal clinical specimens depend on various factors of ease of accessibility,  
84 non-invasive nature, lesser risk to health care professional while collecting specimen and  
85 good viral loads for higher chances of detection. Collection of BAL, ET and FBB although  
86 have a higher detection rate and may be a specimen of choice in admitted pneumonia cases,  
87 yet it always pose a risk of generating droplets to cause infection to healthcare workers.  
88 Additionally, they also cannot be a specimen of choice in managing pandemic infection of  
89 COVID-19 showing variable clinical manifestation from asymptomatic to mild/moderate and  
90 severe cases. Sputum, on the other hand, also pose a challenge not only for collection from  
91 cases of COVID-19 patients with dry cough but also for lower detection rate of nCoV as  
92 reported earlier [12]. Overall, there is certain uncertainty on understanding the  
93 specimens/sites from which the virus can be maximally diagnosed without posing health  
94 hazard to healthcare worker. Furthermore, these published studies have also not addressed  
95 optimal specimen in patients undergoing treatment to provide the appropriate prognostic  
96 indicator of viral clearance in patients undergoing treatment. Considering these facts, this  
97 study was undertaken to evaluate the various clinical specimens that appears to be more  
98 accessible and feasible and can become a specimen of choice for early identification of  
99 SARS-CoV-2 for better management of COVID-19 pandemic. The proposed study has thus  
100 evaluated various specimens comprising of combined / paired naso and oropharyngeal swab

101 (here after referred as a combined swab in the text), NPS, OPS, sputum, plasma, serum, urine  
102 and tracheal aspirate from known positive COVID-19 patients to understand their diagnostic  
103 utility in detection of SARS-CoV-2 as well as monitoring of follow-up cases of COVID-19  
104 undergoing treatment. This study will also provide insight if this virus can also be transmitted  
105 in other ways, then merely by respiratory droplets.

## 106 2. Methods

### 107 2.1. Patient selection

108 All India Institute of Medical Sciences (AIIMS)-Raipur is one of the designated tertiary-care  
109 hospital for diagnosis and treatment of COVID-19 patients in Chhattisgarh, a state in Central  
110 India. A total of 5000 suspected patients, fulfilling either of the various testing criteria, laid  
111 down by the government of India, for COVID-19 testing, were referred to AIIMS, Raipur for  
112 diagnosis of COVID-19 by rRT-PCR test, from May 2020 till June 2020 [19].

113 Among 5000-suspected patients, 137 outpatients were diagnosed for COVID-19 infection  
114 (2.7% positivity rate) by rRT-PCR using combined swab. All these patients subsequently  
115 admitted in the COVID ward of AIIMS, Raipur for isolation and treatment. These patients  
116 were evaluated in terms of following inclusion and exclusion criteria.

#### 117 *Inclusion criteria*

118 All suspected COVID-19 symptomatic patients were included in the study if fulfilling the  
119 following criteria-

- 120 a. Detected positive for COVID-19 infection by rRT-PCR.
- 121 b. Not on any anti-viral / anti-malarial (Hydroxychloroquine) / antibiotic (Azithromycin).
- 122 c. Admitted in COVID-19 ward of AIIMS, Raipur for treatment.

#### 123 *Exclusion criteria*

**Commented [DSN3]:** Specific Comment 4: Line 69: Change "Sputum, Plasma, Serum, Urine and Tracheal aspirate" to "sputum, plasma, serum, urine and tracheal aspirate".

Reply: As per the suggestion, we have changed the "Sputum, Plasma, Serum, Urine and Tracheal aspirate" to "sputum, plasma, serum, urine and tracheal aspirate".

124 a. Nonfulfillment of any of the inclusion criteria was considered as the exclusion criteria  
125 in the present study.

126 Among them, 07 patients with recent history of taking Azithromycin were excluded.  
127 Accordingly, only 130 patients were enrolled in the study after taking their consent. This  
128 study was approved by the Institutional ethical committee (IEC) of AIIMS, Raipur,  
129 Chhattisgarh (AIIMSRPR/IEC/2020/536).

130 Before starting a standard treatment regimen of Hydroxychloroquine and Azithromycin, all  
131 these patients were requested to provide clinical specimens of the following nature.

- 132 a. NPS
- 133 b. OPS
- 134 c. Combined ( naso and oropharyngeal) swab
- 135 d. Sputum
- 136 e. Serum
- 137 f. Plasma
- 138 g. Urine

139 Every swab specimen was collected in viral transport medium(VTM) (HiMedia, India) from  
140 these patients in morning before washing in the morning using sterile flocked nylon swab.

141 An NPS was collected from single nostril (posterior nasopharynx) while OPS was collected  
142 from both sides of the throat. The combined swab of both NPS and OPS was collected in a  
143 single tube of VTM. In total,  $7 \times 130 = 910$  specimens were tested by rRT-PCR. In addition,

144 14 tracheal aspirates were also obtained from an equal number of intubated patients. Thus,  
145  $910 + 14 = 924$  specimens were obtained from new patients prior to starting their treatment.

146 The positivity rate with all the seven types of clinical specimen was also tested in randomly  
147 selected 15 patients in their daily follow-up specimen of seven types until the negative

**Commented [DSN4]:** Specific Comment 5: Line 97: Need approval #.

Journal requirement comment no. 3:

Thank you for including the following ethics statement on the submission details page: 'Study is approved form Institutional Ethical committee.

Name of committe: IEC-AIIMS, Riapur.  
Approval number: AIIMSRPR/IEC/2020/536'  
Please also include the specific name of your ethics committee and the approval number in the Methods section of your manuscript."

Our Reply: We have obtained the approval from Institute Ethics Committee(IEC), AIIMS, Raipur, Chhattisgarh for the study. The ethical sanction number allotted was AIIMSRPR/IEC/2020/536. The same has been incorporated in line number 128-129 of the revised manuscript.

**Commented [DSN5]:** What is combined swab? Do the authors mean combined nose throat swab? Please clarify.

Reply: We kindly submit that the combined swab consist of both nasopharyngeal and oropharyngeal swab in a single tube of viral transport medium. The same has been incorporated in the revised manuscript.

148 finding of rRT-PCR were achieved in two consecutive days specimens of all seven types. Six  
 149 hundred sixty five (665) follow-up specimens were collected from these 15 admitted patients.  
 150 Thus, 924 initial and 665 follow-up specimens were tested by rRT-PCR for the identification  
 151 of SARS-CoV-2.

## 152 2.2. RNA extraction

153 All the clinical specimens were processed for viral RNA isolation by using commercially  
 154 available QIAgen Viral RNA extraction kit, Germany, as per the manufacturer instructions.  
 155 Briefly, 140µl of the specimen has been treated with 560µl of prepared buffer AVL  
 156 containing carrier RNA (1 µg/µl). After brief pulse vortexing and 10 minute incubation at  
 157 room temperature, the specimen was precipitated by adding 560µl of pre-chilled ethanol.  
 158 Treated specimen then transferred to the spin column. Viral RNA was purified by  
 159 consecutive treatment with 500µl of buffer AW1 and AW2. Finally, it was eluted in 60µl  
 160 buffer AVE.

## 161 2.3. rRT-PCR test

162 This test was performed with primers and probes provided by ICMR, targeting *E*, *RdRP* and  
 163 *ORF1b* genomic region of SARS-CoV-2 and internal control of human *RNAseP* as described  
 164 earlier [20-22] (Table 1). Briefly, the 25 µl rRT-PCR reaction contained 12.5 µl 2x buffer,  
 165 1µl 25X RT-PCR enzyme mix (both from AgPath One-Step RT-PCR kit, ThermoFisher  
 166 Scientific, USA), 1.5 µl Primer-Probe mix, 5 µl RNAse/DNase free sterile water and 5µl  
 167 RNA template and tested on CFX 96 Real Time PCR machine of Biorad, USA. The thermal  
 168 cycling condition included 55°C for 30 min, 95°C for 3 min and 45 repeated cycles of 95°C  
 169 for 15 sec and 58°C for 30 sec. The tested specimen was considered positive for SARS-CoV-  
 170 2 for the cycle threshold (Ct) value less than or equal to 35 for *E* gene and both *RdRP*, *ORF*

**Commented [DSN6]:** Specific Comments 1: The format of the manuscript needs to be consistent, e.g. change Table 1 to (Table 1), Fig.1 to (Fig. 1), etc.  
 Our Reply: Done in whole manuscript.

**Commented [DSN7]:** Comment 5: Line 130, change 2x buffer to 12.5 µl 2x buffer.  
 Reply: As per the suggestion, we have changed the 2x buffer to 12.5 µl 2x buffer in the line number 164 of the revised manuscript.

171 or either *RdRP* or *ORF*. The positive and negative controls consisted of of viral RNA plasmid  
 172 and sterile nuclease free water respectively.

173 **Table 1. Primer sequence of various genes of SARS-CoV-2 for rRT-PCR.**

| Target gene                      | Sequence(5'-3')                    | Source             |
|----------------------------------|------------------------------------|--------------------|
| <b>E gene</b>                    | ACAGGTACGTTAATAGTTAATAGCGT         | Corman et al. [20] |
|                                  | ATATTGCAGCAGTACGCACACA             |                    |
|                                  | FAM-ACACTAGCCATCCTTACTGCGCTTCG-BHQ |                    |
| <b>RNaseP (Internal Control)</b> | AGATTTGGACCTGCGAGCG                | CDC, 2020. [21]    |
|                                  | GAGCGGCTGTCTCCACAAGT               |                    |
|                                  | FAM-TTCTGACCTGAAGGCTCTGCGCG-BHQ    |                    |
| <b>RdRp(Confirmatory)</b>        | GTGARATGGTCATGTGTGGCGG             | Corman et al. [20] |
|                                  | CARATGTTAAASACACTATTAGCATA         |                    |
|                                  | FAM-CAGGTGGAACCTCATCAGGAGATGC-QSY  |                    |
| <b>ORF 1b(Confirmatory)</b>      | TGGGGYTTTACRGGTAACCT               | Poon et al. [22]   |
|                                  | AACRCGCTTAACAAAGCACTC              |                    |
|                                  | FAM-TAGTTGTGATGCWATCATGACTAG-QSY   |                    |

174

#### 175 **2.4. Gold standard**

176 All 130 rRT-PCR detected cases of COVID-19 infection were considered as the known  
 177 positive cases to evaluate the efficacy of various clinical specimens for diagnostic utility.

#### 178 **2.5. Statistical analysis**

179 Categorical variables were analyzed by chi-square ( $\chi^2$ ) and student t-test by using SPSS 16  
 180 version 18(SPSS Inc., Chicago, IL, USA) to compare intergroup detection rate by considering  
 181  $p < 0.05$  statistically significant.

#### 182 **3. Results**

183 A total of 130 known positive cases of COVID-19 infection were evaluated in their 924  
 184 clinical specimens obtained from different anatomical sites by rRT-PCR for detection of  
 185 SARS-CoV-2 to determine their positivity rate. Demographic analysis of these patients  
 186 showed the median age of 40.14 years (range 5 to 74 years). Among them, 86 were males  
 187 while 44 were females showing significant higher COVID-19 infection rate in male than

**Commented [DSN8]:** Journal requirement comment no. 7: Please include your tables as part of your main manuscript and remove the individual files. Please note that supplementary tables should be uploaded as separate "supporting information" files.

Our reply: Agreeing with the suggestion, we have uploaded all the tables in the main revised manuscript.

**Commented [DSN9]:**

Comment 6: Line 137 – 139, 2.4 Gold standard: This is not how the gold standard is defined. I suggest deleting this section.

Our Reply: For evaluating sensitivity of spectrum of clinical specimens, we need to ensure that the specimen were true representative of COVID-19 infection. At present, as per the WHO and various regional guidelines, rRT-PCR is the reference test for confirming the diagnosis of COVID-19. All these 130 cases found positive by rRT-PCR were hence considered true positive cases of COVID-19 to evaluate diagnostic utility of various specimen before and during treatment.

We are respectfully submitting some of the research article highlighting rRT-PCR as gold standard.

1. Czumbel LM, Kiss S, Farkas N, Mandel I, Hegy A, Nagy A, Lohinai Z et al. Saliva as a candidate for COVID-19 diagnostic testing: A meta-analysis. *Front Med(Lausanne)*. 2020 Aug 4;7:465.

2. Lippi G, Simundic AM, Plebani M. Potential preanalytical and analytical vulnerabilities in the laboratory diagnosis of coronavirus disease 2019 (COVID-19). *Clin Chem Lab Med*. (2020) 58:1070–6. doi: 10.1515/cclm-2020- 0285.

Accordingly, we request you to kindly allow this to remain as such in the manuscript.

188 female ( $\chi^2 = 27.13$ ,  $p=0.00001$ ,  $p<0.05$ ). Male median age calculated was 42.97 year,  
189 whereas female median age observed of 32.07 years.

190 rRT-PCR detected all 130 cases with 100 % positivity in combined swab (Table 2). NPS was  
191 the next appropriate clinical specimen showing a detection rate of 91.5% followed by OPS  
192 and sputum specimens showing 72.3 and 63% positivity respectively. None of the specimens  
193 of urine, plasma or serum showed detection of SARS-CoV-2. The 14 TA specimens showed  
194 92.8% positivity by rRT-PCR. Combined swabs showed significantly higher detection rate of  
195 SARS-CoV-2 in comparison to NPS, OPS and Sputum ( $\chi^2 =75.46$ ,  $p=<0.001$ ,  $p<0.05$ ). On  
196 comparison of various individual specimens with combined swabs, a significant difference  
197 was noticed in positivity rate between combined swab versus NPS ( $\chi^2 =11.48$ ,  $p=0.0007$ ,  
198  $p<0.05$ ), combined swab versus OPS ( $\chi^2 =12.68$ ,  $P=<0.001$ ,  $p<0.05$ ) and combined swab  
199 versus sputum ( $\chi^2=58.86$   $p=<0.001$ ,  $p<0.05$ ). NPS positive detection rate was also found to  
200 be significantly higher as compared to OPS and sputum specimen ( $\chi^2 =16.23$ ,  $p=0.000056$ ,  
201  $p<0.05$ ;  $\chi^2 =30.01$ ,  $p,0.00001$ ,  $p<0.05$ ). However, OPS positive detection rate was not found  
202 significantly higher than sputum positivity ( $\chi^2 =2.53$ ,  $p=0.11$ ,  $p>0.05$ ).

203 **Table 2. Positivity of rRT-PCR in different clinical samples in 130 known COVID-19**  
204 **patients.**

| Total Patient<br>(n=130) | Combined<br>swab<br>(n=130)<br>No.(%)CI | NPS<br>(n=130)<br>No.(%) CI | OPS<br>(n=130)<br>No.(%) CI | Sputum<br>(n=130)<br>No.(%) CI | Urine<br>(n=130)<br>No.(%)<br>CI | Plasma<br>(n=130)<br>No.(%)<br>CI | Serum<br>(n=130)<br>No.(%)<br>CI | Tracheal<br>Aspirate<br>(n=14)<br>No.(%)<br>CI |
|--------------------------|-----------------------------------------|-----------------------------|-----------------------------|--------------------------------|----------------------------------|-----------------------------------|----------------------------------|------------------------------------------------|
| Male (n=86)              | 86(100)<br>(95.8-100)                   | 79(91.5)<br>(83.9-96.6)     | 63 (72.3)<br>(62.6-82.2)    | 54(62.7)<br>(51.7-72.9)        | 0(0)                             | 0                                 | 0                                | 13(92.8)<br>(66.1-99.8)                        |
| Female(n=44)             | 44(100)<br>(91.9-100)                   | 40(90.9)<br>(78.3-97.4)     | 31(70.4)<br>(54.8-83.2)     | 28(63.6)<br>(47.8-77.6)        | 0(0)                             | 0                                 | 0                                | NA                                             |
| Total                    | 130(100)<br>(97.2-100)                  | 119(91.5)<br>(85.3-95.7)    | 94(72.3)<br>(63.8-79.8)     | 82(63.0)<br>(54.2-71.4)        | 0(0)                             | 0                                 | 0                                | 13(92.8)<br>(66.1-99.8)                        |

205 Tracheal aspirate was obtained from 14 male cases only. n( number tested), No. (Number),  
206 % (Percentage), CI(Confidence Interval), NA( No samples were obtained).

207

208 Among individual swabs, NPS showed a higher detection rate than OPS. A total of 25 cases  
 209 (19.2%, 16 males, 9 females) were detected in NPS but undetected in OPS (Table 2).

210 However, a total of 11 (8.4%) cases were missed with NPS alone as the specimen, while  
 211 nCoV was not detectable in 48 (36.9%) sputum specimens. No case was solely detected in  
 212 OPS or sputum.

213 The Ct (threshold cycle) values of *ORF 1b*, *RdRP* and *E* gene were also compared between  
 214 different clinical specimens (Fig. 1). The cluttering of the Ct values was seen due to  
 215 maximum Ct values falling between 20 and 32. The lowest Ct values 10.56, 10.14 and 12.26  
 216 of *E*, *ORF1b* and *RdRP* were obtained in combined swab followed by NPS, Sputum and OPS,  
 217 respectively (Fig. 1). The average Ct value of *E*, *ORF* and *RdRP* were 25.75, 26.94 and 27.06  
 218 in the combined swabs followed by NP, sputum and OP swabs respectively (Fig. 2). It is  
 219 Theoretical correlation of inverse relationship between Ct values and viral load gives  
 220 indication of higher viral load in specimen with low Ct and vice-versa. Thus, it can be  
 221 inferred that maximum viral load was present in the combined swab, followed by NPS,  
 222 sputum and OPS, in that order. The specimens of urine, serum and plasma did not show any  
 223 sigmoidal amplification- based Ct values. The t- test comparison of average Ct value of all  
 224 the targeted genes namely *E*, *ORF1b* and *RdRp* in various specimen categories showed a  
 225 significant difference when the combined swab was compared individually with NPS  
 226 ( $p=0.021$ ,  $t=-2.315$ ), OPS ( $p=0.0003$ ,  $t=-3.66$ ) and sputum ( $p=0.0027$ ,  $t=-3.028$ ).

227 In randomly selected 15 follow up patients' testing, all the seven different types of specimens  
 228 of combined swab, NPS, OPS, sputum, serum, plasma and urine were tested every day till the  
 229 two consecutive days' rRT-PCR showed negative results in every clinical specimen (Fig. 3-4,  
 230 Table 3). In the 'follow-up' category, a total of 665 specimens were obtained over time  
 231 ranging from 4 to 10 days, with an average of 6.66 days (Fig. 3). A gradual increase in Ct  
 232 values of ORF1 b from combined swab, NPS, OPS and sputum were noticed in daily testing

**Commented [DSN10]:** Journal requirement comment 6: We note that you have included the phrase "data not shown" in your manuscript. Unfortunately, this does not meet our data sharing requirements. PLOS does not permit references to inaccessible data. We require that authors provide all relevant data within the paper, Supporting Information files, or in an acceptable, public repository. Please add a citation to support this phrase or upload the data that corresponds with these findings to a stable repository (such as Figshare or Dryad) and provide and URLs, DOIs, or accession numbers that may be used to access these data. Or, if the data are not a core part of the research being presented in your study, we ask that you remove the phrase that refers to these data.

Our reply: We kindly submit that NPS and OPS specimen detected 119 and 94 cases respectively leaving 25 cases undetected by OPS. This statement has been adequately shown in Table 2. So, considering the phrase "data not shown" untrue, we have deleted the same and cited Table 2 in its place.



233 indicating patients' affirmative response to treatment and virus clearance while other  
 234 specimens of plasma, serum and urine showed no detection of SARS-CoV-2 (Fig. 4). The  
 235 maximum longer duration of days for clearance of virus was observed in combined swab  
 236 (Fig. 4, Table 3). Earliest clearance with maximum detection of ORF1b was seen in patient  
 237 P3 in which combined swab and NPS showed the presence of virus for only two treatment  
 238 days and P11 in which only combined swab showed the presence of virus for two treatment  
 239 days. Patients 1, 2, 7, 9, 11, 12, 13, 14 and 15 exclusively showed longer duration of  
 240 detection of nCOV in a combined swab. Patient 10 shed virus in combined and NPS  
 241 specimen for longest nine days, followed by P7, which showed nCoV detection in only  
 242 combined swab for consecutive seven days. During treatment monitoring, the average days of  
 243 rRT-PCR positivity were 4.5, 3.7, 3.4 and 3.6 from combined swab, NPS, OPS and sputum,  
 244 respectively.

245 **Table 3.** ORF1b positivity of various samples for maximum number of days in daily  
 246 monitoring of 15 follow up cases.

247

| Patient No.           | ORF1b positivity for maximum number of days during treatment |     |     |            |
|-----------------------|--------------------------------------------------------------|-----|-----|------------|
|                       | Combined swab                                                | NPS | OPS | Sputum 248 |
| P1                    | 5                                                            | 4   | 4   | 4          |
| P2                    | 4                                                            | 3   | 2   | 3          |
| P3                    | 2                                                            | 2   | 1   | 1 249      |
| P4                    | 4                                                            | 3   | 3   | 3          |
| P5                    | 4                                                            | 4   | 4   | 4          |
| P6                    | 4                                                            | 4   | 3   | 3 250      |
| P7                    | 7                                                            | 5   | 5   | 5          |
| P8                    | 3                                                            | 3   | 3   | 3          |
| P9                    | 4                                                            | 2   | 2   | 2 251      |
| P10                   | 9                                                            | 9   | 8   | 9          |
| P11                   | 2                                                            | 1   | 1   | 1          |
| P12                   | 5                                                            | 4   | 4   | 4          |
| P13                   | 6                                                            | 5   | 5   | 5 252      |
| P14                   | 5                                                            | 4   | 4   | 4          |
| P15                   | 4                                                            | 3   | 3   | 3          |
| Average<br>positivity | 4.5                                                          | 3.7 | 3.4 | 3.6 253    |

254

255

#### 256 **4. Discussion**

257 The discharge policy for COVID-19 cases emphasized negative rRT-PCR findings on two  
258 consecutive days respiratory specimen after symptom resolves. To give specific and accurate  
259 negative results, every laboratory needs to rule out false negative PCR result, which  
260 otherwise would lead to discharge of such patient, leading to a high probability of  
261 transmission in the community especially the family members and other close contacts. The  
262 importance of appropriate sampling in helping the lab to diagnose the COVID-19 infection  
263 accurately cannot be overemphasized. An appropriate specimen is the foundation stone for  
264 good laboratory test result and is one of the essential pre-analytical parameters for quality  
265 assurance. It is well-accepted fact that improper specimen is bound to incorrect result. It is  
266 therefore said that '*garbage in will yield garbage out*'. The appropriate specimen must also  
267 be the optimal specimen in monitoring treatment/follow-up cases to help the clinician in  
268 management by taking evidence based decision on discharge. This study was thus conducted  
269 to analyze the most appropriate specimen for performing rRT-PCR to diagnose SARS-CoV-2  
270 and monitor follow-up cases.

271 The present study showed differences in sensitivity of combined swab in comparison to NPS  
272 and OPS with which 8.2 and 19.2% positive cases were missed respectively. Thus, if tested  
273 alone, NPS and OPS may cause remarkable false negative results that could lead to discharge  
274 of these infected patients who are still shedding SARS-CoV-2 from their upper respiratory  
275 tract and may be a potential source for transmission of COVID-19 infection. We have  
276 compared various studies to assess their finding of clinical suitability of different  
277 biodiversified specimens (Table 4). In a study by Wang X et al. [23], it was observed that  
278 73.1% of positive nasopharyngeal cases could not be detected with OPS. Our study  
279 exclusively noted that 19.2% of cases were detected by only combined swabs and were  
280 missed by other specimen types. The detection rate in sputum was significantly lower as



|                     |                 |           |    |      |      |      |     |     |    |     |    |   |   |   |   |    |     |
|---------------------|-----------------|-----------|----|------|------|------|-----|-----|----|-----|----|---|---|---|---|----|-----|
| al. [33]            | e               | Positive  | -  | 155  | 65   | -    | -   | 17  | -  | -   | -  | - | - | - | - | -  | -   |
| Liu R et al. [25]   | Cross sectional | Tested    | 5  | 57   | 4818 | -    | -   | -   | -  | -   | -  | - | - | - | - | -  | -   |
|                     |                 | Positive  | 4  | 28   | 1843 | -    | -   | -   | -  | -   | -  | - | - | - | - | -  | -   |
| Xie et al. [28]     | Cross sectional | Tested    | -  | -    | -    | 19   | -   | 19  | 19 | 19  | -  | - | - | - | - | -  | -   |
|                     |                 | Positive  | -  | -    | -    | 9    | -   | 8   | 0  | 0   | -  | - | - | - | - | -  | -   |
| Liu M et al. [10]   | Cross sectional | Tested    | -  | -    | 47   | 47   | -   | -   | -  | -   | 47 | - | - | - | - | 47 | -   |
|                     |                 | Positive  | -  | -    | 26   | 9    | -   | -   | -  | -   | 1  | - | - | - | - | 23 | -   |
| Rao et al. [11]     | Cross sectional | Tested    | -  | -    | -    | -    | 562 | -   | -  | -   | -  | - | - | - | - | -  | 562 |
|                     |                 | Positive  | -  | -    | -    | -    | 48  | -   | -  | -   | -  | - | - | - | - | -  | 60  |
| Tong et al. [12]    | Cross sectional | Tested    | 15 | 382  | 463  | 39   | -   | 262 | 40 | 135 | 98 | - | - | - | - | -  | -   |
|                     |                 | Positive  | 7  | 61   | 297  | 10   | -   | 32  | 3  | 12  | 8  | - | - | - | - | -  | -   |
| Zhang H et al. [13] | Cross sectional | Tested    | -  | 97   | 97   | 97   | -   | -   | -  | -   | -  | - | - | - | - | 14 | -   |
|                     |                 | Positive# | -  | 79.2 | 37.5 | 20.8 | -   | -   | -  | -   | -  | - | - | - | - | 13 | -   |
| Our study           | Cross sectional | Tested    | -  | 130  | 130  | 130  | 130 | -   | -  | -   | -  | - | - | - | - | 14 | -   |
|                     |                 | Positive  | -  | 82   | 119  | 94   | 130 | -   | -  | -   | -  | - | - | - | - | 13 | -   |

295 \*This study did not show number of specimens detected. # Figures represent percentage.

296

297 In case, if only one swab is to be used for COVID-19 diagnosis, then NPS should be  
 298 preferred over other specimens of OPS, sputum, serum, plasma and urine considering its  
 299 higher detection rate of nCoV in our study. This preference is in line with the earlier finding  
 300 of Tong et al. [12] who found higher detection rate of nCoV in NPS than BAL, OPS, Sputum,  
 301 Urine, Blood, stool, anal swabs and corneal secretions. The finding of Tong et al. [12], Lo et  
 302 al. [26], Wang X et al. [23], Wang W et al. [14] and meta-analysis by Czumbel et al. [27] also  
 303 showed NPS a better specimen for detecting SARS-CoV-2. The higher positivity rate of NPS  
 304 could be correlated to high viral load in nasopharynx than other anatomical sites/specimens.

305 Our study also found no detection of SARS-CoV-2 in clinical specimens of serum, plasma  
 306 and urine. Earlier reported study too not found nCoV in either blood or urine specimen [28].  
 307 Chan et al. [24], Lo et al. [26], Wang W et al. [14] and reported meta-analysis showed

308 negative results in urine specimen [17]. In contrast, only Tong et al. [12] had detected nCoV  
309 in urine, albeit with a low positivity rate of 16.3%. While the blood specimen was also  
310 reported of low positivity of 12.5%, 1% and 0.9% by Tong et al. [12], Bwire et al. [17] and  
311 Wang W et al. [14] respectively. Chan et al. [24] found only one positive among three tested  
312 serum specimens while there was no positivity detected in plasma specimen. The number of  
313 specimens tested by Chan et al. [24] is too low to draw any relevant conclusion. Thus, it is  
314 advocated to conduct more studies on larger cohort to evaluate the role of blood and its  
315 components in diagnosing SARS-CoV-2 by rRT-PCR and its potential role in transmitting  
316 the virus. Ours and earlier published analysis for the absence of SARS-CoV-2 in urine  
317 showed that it is not shed from the urogenital system. Among the optimal specimen, Bwire et  
318 al. [17] meta-analysis found bronchoalveolar lavage fluid with higher positive(91.8% ) rate  
319 of detection of SARS-CoV-2 followed by rectal swabs (87.8%), sputum (68.1%),  
320 nasopharyngeal swab (45.5%), feces (32.8%), oropharyngeal swab (7.6%), and blood  
321 samples (1.0%). Another meta-analysis on respiratory samples found sputum with a  
322 significantly higher positive rate of detection of nCoV followed by NPS and OPS [18]. Tong  
323 et al. [12], on the other hand, found NPS of highest positive detection rate of nCoV among  
324 specimen spectrum of BAL, NPS, OPS, sputum, urine, blood, stool, anal swab and corneal  
325 secretion (2.99%) [12]. Rao et al. [11], found saliva a better specimen than paired NPS+ OPS  
326 swab. Thus, it is inferred, that ideal appropriate specimen varied in above-discussed studies.  
327 However, considering, the fact that more studies finds NPS an ideal specimen in the  
328 identification of nCoV, our suggested combined swab may fit more into the definition of  
329 appropriate specimen in the pandemic situation due to fulfilling the parameters of  
330 applicability in variable clinical spectrum of the disease, easy accessibility in a larger group  
331 of patients, lesser risk hazard to health worker and higher detection rate than NPS.

**Commented [DSN11]:** Specific Comment 7: Line 266: The positive rate should be 0.9% not 0.009%.

**Our Reply:** We sincerely apologize for typing error. We have changed 0.009% to 0.9% in the line number 310 of the revised manuscript.

332 The present study also showed a high positive rate of COVID-19 in males than females as  
333 infected males were almost twice that of females. The various earlier studies and meta-  
334 analysis too observed higher male susceptibility than females to COVID-19[14, 23, 29]. The  
335 prominent possible factors included higher expression of angiotensin-converting enzyme -2  
336 (ACE-2) attachment receptors in males than females, higher incidence of heart disease, high  
337 blood pressure in males, immunological differences driven by hormones and X chromosome,  
338 behavioral difference of higher level of smoking, drinking. Higher susceptibility of males was  
339 further precipitated by the reported epidemiological observation of males more casual  
340 approach than females in appropriate compliance to masking, hand hygiene and social  
341 distancing practices [30, 31].

342 In terms of correlating lower Ct value with high viral load, our study showed high viral load  
343 detected in the combined swab than other specimens. The individual NPS had the lowest Ct  
344 values in comparison to other individual specimens. This finding has also been corroborated  
345 by Wang W et al. [14], and Zou et al. [32], who also found higher viral load in NPS than  
346 OPS.

347 Our study also exclusively assessed the most appropriate clinical specimen to monitor the  
348 COVID-19 patients' treatment during their follow-up. Combined swabs exhibited longer  
349 duration of detection of nCoV as it is the last specimen during treatment follow-up to become  
350 negative among all seven types of specimens tested. This finding indicates that the combined  
351 swabs were the most appropriate specimen to assess virus clearance among the follow-up  
352 patients and thus equip the clinician in patient management and discharge. Data search found  
353 one brief report on 22 patients showing that sputum and feces remain positive even after NPS  
354 turn negative [33]. Another study on ten pediatric COVID 19 patients by Xu et al. [34]  
355 showed that rRT-PCR of rectal swabs was persistently positive after their NPS had become  
356 negative.

357 Novelty of the present study lies in finding combined swabs of ideal specimen in both  
 358 diagnosis and monitoring of treatment follow-up of symptomatic patients to better assess  
 359 virus clearance, which eventually help in discharge of truly recovered patients. This finding  
 360 has clinical implication as early negative with other specimen in follow-up investigation can  
 361 give pseudoimpression of virus clearance leading to the potential risk of transmission of the  
 362 COVID-19 infection in case if such patients are discharged. Among the published literature,  
 363 Rao et al. [11], although found lower sensitivity of paired NPS + OPS swab versus saliva in  
 364 asymptomatic patient, the difference of study group leaves a scope of further study involving  
 365 both symptomatic and asymptomatic patients. Nevertheless, the probable reason for higher  
 366 positivity using combined swab in our study than Rao et al. [11] could be the more viral load  
 367 in symptomatic than in asymptomatic patients and strict adherence to sample collection in the  
 368 morning without nasal and throat wash.

369 Although stool and rectal/anal swab specimen were not tested in our study, few studies  
 370 showing detection of nCoV in these specimen indicate them as a potential specimen for  
 371 diagnosis [5, 10, 12, 14, 17, 23]. These findings may suggest of nCoV resist the human gut  
 372 acidic medium and could be transmitted through the fecal route. Presence of nCoV in stool is  
 373 also substantiated by evidential presence of its receptors ACE 2 in enterocytes. Nevertheless,  
 374 the correlation of this potential biological specimen for diagnosis and probability of the virus  
 375 transmission through feco-oral route deserves further evaluation, since the virus viability in  
 376 stool has not yet fully explored except Wang W et al. [14] reporting live nCoV from the  
 377 stool specimen.

378 The present study limitation includes non-evaluation of some of the other potential specimens  
 379 like BAL, FBB, saliva, stool and rectal swab. Obtaining BAL and FBB was avoided since  
 380 collection requires an invasive procedure that may pose high-risk exposure of aerosol  
 381 generation to health care workers. The feces and rectal/anal swab are also not primarily

**Commented [DSN12]:** Comment 1. It is clear when one looks at the cited works of the manuscript that the reference search of the authors ended in mid June 2020. No later paper is cited except a WHO guideline. This is unacceptable in this exploding area of research.

Both that introduction and the discussion must include recent comparative meta-analyses on the subject. In this respect, the Discussion should also emphasize the novelty of the present work compared to those.

382 indicated considering the respiratory droplet being the commonest established mode of  
 383 transmission of nCoV. Clinical specimen of feces and rectal/anal swab cannot be considered  
 384 an optimal specimen considering the limitation of difficulty in collection, transport and  
 385 processing in comparison to respiratory specimens. Another specimen of saliva has a variable  
 386 reported finding. Apart from Rao et al. [11] who found saliva a better specimen, earlier  
 387 reported meta-analysis and review had found saliva of low sensitivity than NPS [27, 35].  
 388 Considering these facts, we have not included saliva in our study in addition to another  
 389 reason that it was not recommended by either WHO or our regional authorities (ICMR) in  
 390 their interim guidance for detection of SARS-CoV-2 [19, 36]. We could not correlate Ct  
 391 values of *ORF1b* and *RdRP* with clinical features or disease course because most of the  
 392 patients' detailed clinical information was not available.

393 Thus, this study concludes that NPS and OPS alone may miss some SARS-CoV-2 positive  
 394 cases and hence should not be used exclusively as the sole specimen for diagnosis. Clinical  
 395 specimen of serum, plasma and urine also not to be used in detection of SARS-CoV-2 by  
 396 rRT-PCR. This study strongly recommends combined swab as the preferred clinical specimen  
 397 for detection of SARS-CoV-2 to establish diagnosis of COVID-19. The combined swab may  
 398 also be considered the most appropriate specimen in monitoring the follow-up cases to  
 399 provide a better prognostic indicator of viral clearance during treatment. Therefore, the  
 400 specimen of combined swab has tremendous translational value for defining the  
 401 recommendation in testing guidelines. Implementing the same globally will help manage and  
 402 control the pandemic, as it is the hour's need. Lower Ct in combined and NPS specimen  
 403 also indicates towards the indirect evidence of posterior nasopharynx as the primary nCoV  
 404 colonization site. Since blood, serum, plasma and urine were negative for presence of nCoV  
 405 in our study, the other route of transmission was not confirmed in the study and requires more  
 406 studies with larger sample size for specific conclusive finding.

**Commented [DSN13]:** Reviewer comment 3. The authors suggested that their lower Ct in combined and NPS swab indicated the primary nCoV colonization site is the posterior nasopharynx. They did not provide any direct evidence for this. Therefore this should be removed from the major findings and conclusion. However, the indirect evidence that they provided should be discussed and compared to data of others received by other methodologies.

Our reply: **Our reply:** As per the suggestion, we have removed our statement 'primary nCoV colonization site is the posterior nasopharynx', and modified it as indirect evidence in the discussion.



**407 Conflict of Interest**

408 The authors have declared that no competing interest exists.

**409 Funding Source**

410 AIIMS, Raipur, Chhattisgarh (AIIMS/Raipur/Admin/110).

**411 Authors Contributions**

412 Negi SS, Nagarkar NM, Bhargava A and Das P contributed to conception and design of the  
413 manuscript. Behra A was responsible for management of clinical specimen. Sharma K,  
414 Aggarwala P, Gandhi D, Mathias A, Sharma S, Singh P, Negi SS contributed in processing,  
415 testing and analysis of the specimens by rRT-PCR. Gaikwad U and Wankhede A searched  
416 the literature and helped in comparative analysis of our test results with earlier studies. Negi  
417 SS wrote manuscript. Negi SS and Gandhi D helped in statistical analysis. Bhargava A, Das P  
418 and Nagarkar NM critically reviewed the manuscript.

**419 References**

- 420 1. Gorbalenya AE, Baker SC, Baric RS, de Groot RJ, Drosten C, Gulyaeva AA, et al.  
421 &lt;em&gt;Severe acute respiratory syndrome-related coronavirus&lt;/em&gt;: The  
422 species and its viruses – a statement of the Coronavirus Study Group. bioRxiv. 2020;  
423 2020.02.07.937862. doi:10.1101/2020.02.07.937862
- 424 2. WHO. WHO Coronavirus Disease (COVID-19) Dashboard. In:  
425 <https://covid19.who.int/> [Internet]. 2020 [cited 11 Nov 2020]. Available:  
426 <https://covid19.who.int/>
- 427 3. Bhandari S, Singh A, Sharma R, Rankawat G, Banerjee S, Gupta V, et al.  
428 Characteristics, Treatment Outcomes and Role of Hydroxychloroquine among 522

- 429 COVID-19 hospitalized patients in Jaipur City: An Epidemio-Clinical Study. *J Assoc*  
430 *Physicians India*. 2020;68: 13–19.
- 431 4. Wu Z, McGoogan JM. Characteristics of and Important Lessons From the Coronavirus  
432 Disease 2019 (COVID-19) Outbreak in China: Summary of a Report of 72 314 Cases  
433 From the Chinese Center for Disease Control and Prevention. *JAMA*. 2020;323: 1239–  
434 1242. doi:10.1001/jama.2020.2648
- 435 5. Wang D, Hu B, Hu C, Zhu F, Liu X, Zhang J, et al. Clinical Characteristics of 138  
436 Hospitalized Patients With 2019 Novel Coronavirus–Infected Pneumonia in Wuhan,  
437 China. *JAMA*. 2020;323: 1061–1069. doi:10.1001/jama.2020.1585
- 438 6. Takayama K. In Vitro and Animal Models for SARS-CoV-2 research. *Trends*  
439 *Pharmacol Sci*. 2020/05/30. 2020;41: 513–517. doi:10.1016/j.tips.2020.05.005
- 440 7. Abduljalil J. Laboratory diagnosis of SARS-CoV-2: available approaches and  
441 limitations. *New Microbes New Infect*. 2020;36: 100713.  
442 doi:10.1016/j.nmni.2020.100713
- 443 8. Kontou PI, Braliou GG, Dimou NL, Nikolopoulos G, Bagos PG. Antibody Tests in  
444 Detecting SARS-CoV-2 Infection: A Meta-Analysis. *Diagnostics (Basel, Switzerland)*.  
445 2020;10: 319. doi:10.3390/diagnostics10050319
- 446 9. Gao Z. Efficient management of novel coronavirus pneumonia by efficient prevention  
447 and control in scientific manner. *Zhonghua Jie He He Hu Xi Za Zhi*. 2020;43: E001.  
448 doi:10.3760/cma.j.issn.1001-0939.2020.0001
- 449 10. Liu M, Li Q, Zhou J, Ai W, Zheng X, Zeng J, et al. Value of swab types and collection  
450 time on SARS-COV-2 detection using RT-PCR assay. *J Virol Methods*. 2020/09/16.  
451 2020;286: 113974. doi:10.1016/j.jviromet.2020.113974

- 452 11. Rao M, Rashid FA, Sabri FSAH, Jamil NN, Seradja V, Abdullah NA, et al. COVID-19  
453 screening test by using random oropharyngeal saliva. *J Med Virol.* 2021;n/a.  
454 doi:<https://doi.org/10.1002/jmv.26773>
- 455 12. Tong Y, Bao A, Chen H, Huang J, Lv Z, Feng L, et al. Necessity for detection of  
456 SARS-CoV-2 RNA in multiple types of specimens for the discharge of the patients  
457 with COVID-19. *J Transl Med.* 2020;18: 411. doi:10.1186/s12967-020-02580-w
- 458 13. Zhang H, Chen M, Zhang Y, Wen J, Wang Y, Wang L, et al. The Yield and  
459 Consistency of the Detection of SARS-CoV-2 in Multiple Respiratory Specimens.  
460 *Open Forum Infect Dis.* 2020;7. doi:10.1093/ofid/ofaa379
- 461 14. Wang W, Xu Y, Gao R, Lu R, Han K, Wu G, et al. Detection of SARS-CoV-2 in  
462 Different Types of Clinical Specimens. *JAMA.* 2020;323: 1843–1844.  
463 doi:10.1001/jama.2020.3786
- 464 15. Zhang W, Du R-H, Li B, Zheng X-S, Yang X-L, Hu B, et al. Molecular and  
465 serological investigation of 2019-nCoV infected patients: implication of multiple  
466 shedding routes. *Emerg Microbes Infect.* 2020;9: 386–389.  
467 doi:10.1080/22221751.2020.1729071
- 468 16. Pan Y, Zhang D, Yang P, Poon LLM, Wang Q. Viral load of SARS-CoV-2 in clinical  
469 samples. *Lancet Infect Dis.* 2020/02/24. 2020;20: 411–412. doi:10.1016/S1473-  
470 3099(20)30113-4
- 471 17. Bwire GM, Majigo M V, Njiro BJ, Mawazo A. Detection profile of SARS-CoV-2  
472 using RT-PCR in different types of clinical specimens: A systematic review and meta-  
473 analysis. *J Med Virol.* 2021;93: 719–725. doi:<https://doi.org/10.1002/jmv.26349>
- 474 18. Mohammadi A, Esmacilzadeh E, Li Y, Bosch RJ, Li JZ. SARS-CoV-2 detection in

- 475 different respiratory sites: A systematic review and meta-analysis. *EBioMedicine*.  
476 2020;59: 102903. doi:<https://doi.org/10.1016/j.ebiom.2020.102903>
- 477 19. ICMR. Indian Council of Medical Research (ICMR).Strategy for COVID-19 testing in  
478 India. Version 5. In: [https:// www.icmr.gov.in / pdf / covid / strategy /](https://www.icmr.gov.in/pdf/covid/strategy/Testing_Strategy_v5_18052020.pdf)  
479 [Testing\\_Strategy\\_v5\\_18052020.pdf](https://www.icmr.gov.in/pdf/covid/strategy/Testing_Strategy_v5_18052020.pdf). [Internet]. 2020 [cited 18 May 2020]. Available:  
480 [https:// www.icmr.gov.in / pdf / covid / strategy / Testing\\_Strategy\\_v5\\_](https://www.icmr.gov.in/pdf/covid/strategy/Testing_Strategy_v5_18052020.pdf)  
481 [18052020.pdf](https://www.icmr.gov.in/pdf/covid/strategy/Testing_Strategy_v5_18052020.pdf).
- 482 20. Corman VM, Landt O, Kaiser M, Molenkamp R, Meijer A, Chu DK, et al. Detection  
483 of 2019 novel coronavirus (2019-nCoV) by real-time RT-PCR. *Euro Surveill*. 2020;25:  
484 2000045. doi:10.2807/1560-7917.ES.2020.25.3.2000045
- 485 21. WHO. CDC protocol of realtime RTPCR for influenza A (H1N1). In: [https:// www .  
486 who. Int / csr / resources / publications / swineflu / real time rtpr/en/](https://www.who.int/csr/resources/publications/swineflu/real_time_rtpr/en/). [Internet]. 2020  
487 [cited 22 Sep 2020]. Available: [https:// www . who. Int / csr / resources / publications  
488 / swineflu / real time rtpr/en/](https://www.who.int/csr/resources/publications/swineflu/real_time_rtpr/en/).
- 489 22. Poon L, Chu D, Peiris M. Detection of 2019 novel coronavirus(2019-nCoV) in  
490 suspected human cases by RT-PCR. School of Public Health, The University of Hong  
491 Kong, Hong Kong. In: [https://www.who.int/docs/default-source/coronaviruse/peiris-  
492 protocol-16-1-20](https://www.who.int/docs/default-source/coronaviruse/peiris-protocol-16-1-20). [Internet]. 2020 [cited 22 Sep 2020]. Available:  
493 <https://www.who.int/docs/default-source/coronaviruse/peiris-protocol-16-1-20>.
- 494 23. Wang X, Tan L, Wang X, Liu W, Lu Y, Cheng L, et al. Comparison of  
495 nasopharyngeal and oropharyngeal swabs for SARS-CoV-2 detection in 353 patients  
496 received tests with both specimens simultaneously. *Int J Infect Dis*. 2020/04/18.  
497 2020;94: 107–109. doi:10.1016/j.ijid.2020.04.023

- 498 24. Chan JF-W, Yuan S, Kok K-H, To KK-W, Chu H, Yang J, et al. A familial cluster of  
499 pneumonia associated with the 2019 novel coronavirus indicating person-to-person  
500 transmission: a study of a family cluster. *Lancet*. 2020;395: 514–523.  
501 doi:10.1016/S0140-6736(20)30154-9
- 502 25. Liu R, Han H, Liu F, Lv Z, Wu K, Liu Y, et al. Positive rate of RT-PCR detection of  
503 SARS-CoV-2 infection in 4880 cases from one hospital in Wuhan, China, from Jan to  
504 Feb 2020. *Clin Chim Acta*. 2020/03/07. 2020;505: 172–175.  
505 doi:10.1016/j.cca.2020.03.009
- 506 26. Lo IL, Lio CF, Cheong HH, Lei CI, Cheong TH, Zhong X, et al. Evaluation of SARS-  
507 CoV-2 RNA shedding in clinical specimens and clinical characteristics of 10 patients  
508 with COVID-19 in Macau. *Int J Biol Sci*. 2020;16: 1698–1707. doi:10.7150/ijbs.45357
- 509 27. Czumbel LM, Kiss S, Farkas N, Mandel I, Hegyi A, Nagy Á, et al. Saliva as a  
510 Candidate for COVID-19 Diagnostic Testing: A Meta-Analysis. *Front Med*. 2020;7:  
511 465. doi:10.3389/fmed.2020.00465
- 512 28. Xie C, Jiang L, Huang G, Pu H, Gong B, Lin H, et al. Comparison of different samples  
513 for 2019 novel coronavirus detection by nucleic acid amplification tests. *Int J Infect*  
514 *Dis*. 2020;93: 264–267. doi:https://doi.org/10.1016/j.ijid.2020.02.050
- 515 29. Wei X, Xiao Y-T, Wang J, Chen R, Zhang W, Yang Y, et al. Sex Differences in  
516 Severity and Mortality Among Patients With COVID-19: Evidence from Pooled  
517 Literature Analysis and Insights from Integrated Bioinformatic Analysis. 2020.
- 518 30. Bwire GM. Coronavirus: Why Men are More Vulnerable to Covid-19 Than Women?  
519 *SN Compr Clin Med*. 2020; 1–3. doi:10.1007/s42399-020-00341-w
- 520 31. Sharma G, Volgman AS, Michos ED. Sex Differences in Mortality From COVID-19

- 521 Pandemic: Are Men Vulnerable and Women Protected? *JACC Case reports*.  
522 2020/05/04. 2020;2: 1407–1410. doi:10.1016/j.jaccas.2020.04.027
- 523 32. Zou L, Ruan F, Huang M, Liang L, Huang H, Hong Z, et al. SARS-CoV-2 Viral Load  
524 in Upper Respiratory Specimens of Infected Patients. *N Engl J Med*. 2020;382: 1177–  
525 1179. doi:10.1056/NEJMc2001737
- 526 33. Chen C, Gao G, Xu Y, Pu L, Wang Q, Wang L, et al. SARS-CoV-2-Positive Sputum  
527 and Feces After Conversion of Pharyngeal Samples in Patients With COVID-19. *Ann*  
528 *Intern Med*. 2020/03/30. 2020;172: 832–834. doi:10.7326/M20-0991
- 529 34. Xu Y, Li X, Zhu B, Liang H, Fang C, Gong Y, et al. Characteristics of pediatric  
530 SARS-CoV-2 infection and potential evidence for persistent fecal viral shedding. *Nat*  
531 *Med*. 2020/03/13. 2020;26: 502–505. doi:10.1038/s41591-020-0817-4
- 532 35. Martinez RM. Clinical Samples for SARS-CoV-2 Detection: Review of the Early  
533 Literature. *Clin Microbiol Newsl*. 2020;42: 121–127.  
534 doi:<https://doi.org/10.1016/j.clinmicnews.2020.07.001>
- 535 36. WHO. Interim Guidance Diagnostic testing for SARS-CoV-2. In:  
536 [https://apps.who.int/iris/bitstream/handle/10665/334254/WHO-2019-nCoV-laboratory-](https://apps.who.int/iris/bitstream/handle/10665/334254/WHO-2019-nCoV-laboratory-2020.6-eng)  
537 2020.6-eng [Internet]. 2020 [cited 3 Feb 2020]. Available:  
538 [https://apps.who.int/iris/bitstream/handle/10665/334254/WHO-2019-nCoV-laboratory-](https://apps.who.int/iris/bitstream/handle/10665/334254/WHO-2019-nCoV-laboratory-2020.6-eng)  
539 2020.6-eng
- 540

### Comments and their reply

Comments 1: The format of the manuscript needs to be consistent, e.g. change Table 1 to (Table 1), Fig.1 to (Fig. 1), etc.

Reply: We sincerely apologize for our mistake. As per the suggestion, we have revised the format of the whole manuscript as per the PLOS One requirement.

Comment 2: Abstract, line 8: Please spell out Please spell out NPS (nasopharyngeal swabs) and OPS (oropharyngeal swabs) here since this is the first time NPS and OPS were mentioned. What is combined swab? Do the authors mean combined nose throat swab? Please clarify.

Reply: As per the kind suggestion of the reviewer, we have spell out NPS and OPS as Nasopharyngeal and Oropharyngeal swab respectively in line 8 of the revised abstract. We further kindly submit that the combined swab consist of both nasopharyngeal and oropharyngeal swab in a single tube of viral transport medium. The same has been incorporated in the revised manuscript.

Comment 3: Line 33: "...in extreme of age.", Did the authors mean younger and older or just older? This needs rephrasing and clarify.

Reply: The authors meant to say that people of all ages are susceptible to COVID-19 infection. However, various studies have concluded beyond any doubt that older age group and persons with underlying conditions are more susceptible to COVID-19 infection and had a higher case fatality rate. As per the reviewer suggestion, we have reframed this line and it will now be read as

"The disease can occur in any age group being more complicated and life threatening in patients of older age group and those with underlying co-morbid conditions such as diabetes, hypertension, cardiovascular and cerebrovascular diseases (Bhandari S et al, 2020; Wu and McGoogan JM 2020; Wang D et al, 2020).

Comment 4: Line 69: Change "Sputum, Plasma, Serum, Urine and Tracheal aspirate" to "sputum, plasma, serum, urine and tracheal aspirate".

Reply: As per the suggestion, we have changed the "Sputum, Plasma, Serum, Urine and Tracheal aspirate" to "sputum, plasma, serum, urine and tracheal aspirate".

Comment 5: Line 130, change 2x buffer to 12.5 µl 2x buffer.

Line 97: Need approval #.

Reply: As per the suggestion, we have changed the 2x buffer to 12.5 µl 2x buffer in the revised manuscript.

We have obtained the approval from Institute Ethics Committee, AIIMS, Raipur, Chhattisgarh for the study. The ethical sanction number allotted is AIIMSRPR/IEC/2020/536. The same has been incorporated in the revised manuscript.

Comment 6: Line 137 – 139, 2.4 Gold standard: This is not how the gold standard is defined. I suggest deleting this section.

Reply: Respectfully, it is submitted that in the present study we have evaluated various clinical specimen for their diagnostic utility in detection of SARS-CoV-2 in both new and follow up cases. In such scenario, we need to ensure that the patients must be known diagnosed cases of COVID-19 infection. Since, real time PCR has been recommended throughout the world for diagnosis of SARS-CoV-2 in various clinical specimen during pandemic of COVID-19, we consider these 130 cases diagnosed by rRT-PCR as reference to analyze various clinical samples from them in initial and follow up stages.

Accordingly, we request you to kindly allow this to remain as such in the manuscript.

1. Comment 8: Line 266: The positive rate should be 0.9% not 0.009%.

Reply: We sincerely apologise for typological error. We have changed 0.009% to 0.9% in the revised manuscript.

#### Journal requirement

1. Please ensure that your manuscript meets PLOS ONE's style requirements, including those for file naming. The PLOS ONE style templates can be found at [https://journals.plos.org/plosone/s/file?id=wjVg/PLOSOne\\_formatting\\_sample\\_main\\_body.pdf](https://journals.plos.org/plosone/s/file?id=wjVg/PLOSOne_formatting_sample_main_body.pdf) and [https://journals.plos.org/plosone/s/file?id=ba62/PLOSOne\\_formatting\\_sample\\_title\\_authors\\_affiliations.pdf](https://journals.plos.org/plosone/s/file?id=ba62/PLOSOne_formatting_sample_title_authors_affiliations.pdf)

Our reply: We have ensured that our revised manuscript meet PLOS ONE's style requirements.

2. We suggest you thoroughly copyedit your manuscript for language usage, spelling, and grammar.

Our reply; We have done editing of our manuscript for language usage, spelling and grammar to best of our scientific knowledge.

3. Thank you for including the following ethics statement on the submission details page: 'Study is approved form Institutional Ethical committee.  
Name of committe: IEC-AIIMS, Riapur.  
Approval number: AIIMSRPR/IEC/2020/536'  
Please also include the specific name of your ethics committee and the approval number in the Methods section of your manuscript."



Our reply: The specific name of the ethics committee is Institutional Ethical Committee(IEC), AIIMS, Raipur, Chhattisgarh. The same has been mentioned in the revised manuscript.

4. We note that you have indicated that data from this study are available upon request. PLOS only allows data to be available upon request if there are legal or ethical restrictions on sharing data publicly. For information on unacceptable data access restrictions, please see <http://journals.plos.org/plosone/s/data-availability#loc-unacceptable-data-access-restrictions>.

In your revised cover letter, please address the following prompts:

a) If there are ethical or legal restrictions on sharing a de-identified data set, please explain them in detail (e.g., data contain potentially identifying or sensitive patient information) and who has imposed them (e.g., an ethics committee). Please also provide contact information for a data access committee, ethics committee, or other institutional body to which data requests may be sent.

b) If there are no restrictions, please upload the minimal anonymized data set necessary to replicate your study findings as either Supporting Information files or to a stable, public repository and provide us with the relevant URLs, DOIs, or accession numbers. Please see <http://www.bmj.com/content/340/bmj.c181.long> for guidelines on how to de-identify and prepare clinical data for publication. For a list of acceptable repositories, please see <http://journals.plos.org/plosone/s/data-availability#loc-recommended-repositories>.

We will update your Data Availability statement on your behalf to reflect the information you provide.

Reply: We respectfully submit that data of the study contain the potentially identifying patient's information. Therefore, these data most likely cannot be shared. However, any such request depends on permission from Institutional Ethical Committee, AIIMS, Raipur, Chhattisgarh.

We request the editor to update this statement on our behalf.

5. PLOS requires an ORCID iD for the corresponding author in Editorial Manager on papers submitted after December 6th, 2016. Please ensure that you have an ORCID iD and that it is validated in Editorial Manager. To do this, go to 'Update my Information' (in the upper left-hand corner of the main menu), and click on the Fetch/Validate link next to the ORCID field. This will take you to the ORCID site and allow you to create a new iD or authenticate a pre-existing iD in Editorial Manager. Please see the following

video for instructions on linking an ORCID iD to your Editorial Manager account:  
<https://www.youtube.com/watch?v=xclfvvtxQ>.

Reply: The ORCID iD for the corresponding author is 0000-0002-5292-9132 and the id is validated in Editorial Manager.

6. We note that you have included the phrase “data not shown” in your manuscript. Unfortunately, this does not meet our data sharing requirements. PLOS does not permit references to inaccessible data. We require that authors provide all relevant data within the paper, Supporting Information files, or in an acceptable, public repository. Please add a citation to support this phrase or upload the data that corresponds with these findings to a stable repository (such as Figshare or Dryad) and provide URLs, DOIs, or accession numbers that may be used to access these data. Or, if the data are not a core part of the research being presented in your study, we ask that you remove the phrase that refers to these data.

Our reply: We kindly submit that NPS and OPS specimen detected 119 and 94 cases respectively leaving 25 cases undetected by OPS. This statement is adequately shown in Table 2. So we are removing the phrase “data not shown” and citing Table 2 in place of it.

7. Please include your tables as part of your main manuscript and remove the individual files. Please note that supplementary tables should be uploaded as separate "supporting information" files.

Our reply: Agreeing with the suggestion, we have uploaded all the tables in the main revised manuscript.

#### Reviewer Comments:

1. It is clear when one looks at the cited works of the manuscript that the reference search of the authors ended in mid June 2020. No later paper is cited except a WHO guideline. This is unacceptable in this exploding area of research.

Both that introduction and the discussion must include recent comparative meta-analyses on the subject. In this respect, the Discussion should also emphasize the novelty of the present work compared to those.

Bwire GM, Majigo MV, Njiro BJ, Mawazo A. Detection profile of SARS-CoV-2 using RT-PCR in different types of clinical specimens: A systematic review and meta-analysis. *J Med Virol*. 2021 Feb;93(2):719-725. doi: 10.1002/jmv.26349. Epub 2020 Aug 2. PMID: 32706393; PMCID: PMC7404904.

Mohammadi A, Esmailzadeh E, Li Y, Bosch RJ, Li JZ. SARS-CoV-2 detection in different respiratory sites: A systematic review and meta-analysis. *EBioMedicine*. 2020 Sep;59:102903. doi: 10.1016/j.ebiom.2020.102903. Epub 2020 Jul 24. PMID: 32718896; PMCID: PMC7380223.

Our reply: It is kindly submitted that the authors had already mentioned and discussed the findings of all the research article included in the meta-analysis of Bwire et al like findings of Wang et al, Xu et al, Lo et al, Chan et al, Chen et al, Liu et al, Wang W et al. Further agreeing to your kind suggestion, we have included the specific finding of both these meta-analysis in our discussion. Novelty of the present work also has also been mentioned in revised manuscript mentioned as under.

Among all the published reports, novelty of the present study lies in its assessment of various clinical specimen in both diagnosis and follow-up of COVID-19 patients. To the best of authors' knowledge, none of the earlier studies evaluated combined swabs as the potential clinical specimen in both diagnosis and monitoring of treatment follow-up cases. Present study found combined swab to provide appropriate clinical picture of clearing of the viruses from the patient undergoing treatment as it was the last specimen among all tested specimen to turned negative. This finding has clinical implication as early negative result of other specimen in follow-up investigation can give pseudoimpression of virus clearance leading to potential risk of transmission of the COVID-19 infection in case if such patients are discharged.

2. Key original papers having similar aims as the present work should also be quoted and compared to the present data in the Discussion:

Liu M, Li Q, Zhou J, Ai W, Zheng X, Zeng J, Liu Y, Xiang X, Guo R, Li X, Wu X, Xu H, Jiang L, Zhang H, Chen J, Tian L, Luo J, Luo C. Value of swab types and collection time on SARS-CoV-2 detection using RT-PCR assay. *J Virol Methods*. 2020 Dec;286:113974. doi: 10.1016/j.jviromet.2020.113974. Epub 2020 Sep 16. PMID: 32949663; PMCID: PMC7493793.

Tong Y, Bao A, Chen H, Huang J, Lv Z, Feng L, Cheng Y, Wang Y, Bai L, Rao W, Zheng H, Wu Z, Qiao B, Zhao Z, Wang H, Li Y. Necessity for detection of SARS-CoV-2 RNA in multiple types of specimens for the discharge of the patients with COVID-19. *J Transl Med*. 2020 Nov 2;18(1):411. doi: 10.1186/s12967-020-02580-w. PMID: 33138834; PMCID: PMC7605325.

Zhang H, Chen M, Zhang Y, Wen J, Wang Y, Wang L, Guo J, Liu C, Li D, Wang Y, Bai J, Gao G, Wang S, Yang D, Yu F, Yan L, Wan G, Zhang F. The Yield and Consistency of the Detection of SARS-CoV-2 in Multiple Respiratory Specimens. *Open Forum Infect Dis*. 2020 Aug 26;7(10):ofaa379. doi: 10.1093/ofid/ofaa379. PMID: 33072810; PMCID: PMC7499703.

**Commented [DSN1]:** Comment 1. It is clear when one looks at the cited works of the manuscript that the reference search of the authors ended in mid June 2020. No later paper is cited except a WHO guideline. This is unacceptable in this exploding area of research.

Both that introduction and the discussion must include recent comparative meta-analyses on the subject. In this respect, the Discussion should also emphasize the novelty of the present work compared to those.

Rao M, Rashid FA, Sabri FSAH, Jamil NN, Seradja V, Abdullah NA, Ahmad H, Aren SL, Ali SAS, Ghazali M, Manaf AA, Talib H, Hashim R, Zain R, Thayan R, Amran F, Aris T, Ahmad N. COVID-19 screening test by using random oropharyngeal saliva. *J Med Virol*. 2021 Jan 4. doi: 10.1002/jmv.26773. Epub ahead of print. PMID: 33393672.

**Our reply:** Sincerely acknowledging the kind comment of reviewer, we have incorporated all suggested studies and critically analyzed our result with finding of these studies. In doing so, we have re-framed the introduction and discussion section of the manuscript.

3. The authors suggested that their lower Ct in combined and NPS swab indicated the primary nCoV colonization site is the posterior nasopharynx. They did not provide any direct evidence for this. Therefore this should be removed from the major findings and conclusion. However, the indirect evidence that they provided should be discussed and compared to data of others received by other methodologies.

**Our reply:** As per the suggestion, we have removed our statement of primary nCoV colonization site is the posterior nasopharynx and modified it as indirect evidence in the discussion.

4. The data and the details of Figure 4 are simply invisible. Downloaded high resolution does not help on this a lot. For visibility and clarity, this figure should be completely redrawn.

**Our reply:** We have redrawn the figure 4. Hopefully it will be accessible in high resolution at your end.

5. The limitations of the study should be discussed in the Discussion in more details. For example, saliva is one of the most promising diagnostic sample. This should be discussed. At least the following meta-analysis should be cited and briefly credited in the discussion:

Czumbel LM, Kiss S, Farkas N, Mandel I, Hegyi A, Nagy Á, Lohinai Z, Szakács Z, Hegyi P, Steward MC, Varga G. Saliva as a Candidate for COVID-19 Diagnostic Testing: A Meta-Analysis. *Front Med (Lausanne)*. 2020 Aug 4;7:465. doi: 10.3389/fmed.2020.00465. PMID: 32903849; PMCID: PMC7438940.

**Our reply:** Yes, the limitation of the study has been discussed in more detail in the discussion of revised manuscript.

6. The English language of the paper needs extensive revision by a professional language editor. Particularly, many sentences are very long, complicated, therefore, hard to understand.

Our reply: the English language is revised extensively in the revised manuscript.

---

6. PLOS authors have the option to publish the peer review history of their article ([what does this mean?](#)). If published, this will include your full peer review and any attached files.
